# Supplementary material for: Tandem addition-cyclization reactions of 2-alkynylbenzenamines with isocyanates catalyzed by PdCl2
Source: Royal Society of Chemistry journal article supplement (doi:10.1039/b812015c), 2008-01-01

# Tandem Addition-Cyclization Reactions of 2-Alkynylbenzenamines with Isocyanates Catalyzed by PdCl<sub>2</sub>

*Shengqing Ye,<sup>a</sup> Qiuping Ding,<sup>a</sup> Zhiyong Wang,<sup>a</sup> Haibo Zhou,<sup>a</sup> and Jie Wu<sup>\*a,b</sup>*

<sup>a</sup> Department of Chemistry, Fudan University, 220 Handan Road, Shanghai 200433, China <sup>b</sup> State Key Laboratory of Organometallic Chemistry, Shanghai Institute of Organic Chemistry, 354 Fenglin Road, Shanghai 200032, China

jie\_wu@fudan.edu.cn

## **Supporting Information**

1. General procedure for synthesis of compounds **3** (S2).
2. Characterization data of compounds **3**. (S2-S5).
3. Copies of <sup>1</sup>H and <sup>13</sup>C spectra of compound **3** (S6-S35).

## Experimental Section

All reactions were performed in test tubes under nitrogen atmosphere. Flash column chromatography was performed using silica gel (60-Å pore size, 32–63 μm, standard grade). Analytical thin-layer chromatography was performed using glass plates pre-coated with 0.25 mm 230–400 mesh silica gel impregnated with a fluorescent indicator (254 nm). Thin layer chromatography plates were visualized by exposure to ultraviolet light. Organic solutions were concentrated on rotary evaporators at ~20 Torr (house vacuum) at 25–35 °C. Commercial reagents and solvents were used as received.

*General procedure for reaction of 2-alkynylbenzenamine 1 with isocyanate 2 catalyzed by palladium chloride:* A solution of 2-alkynylbenzenamine **1** (0.50 mmol) and isocyanate **2** (0.75 mmol, 1.5 equiv) in THF (2.0 mL) was stirred at 80 °C for 3 h. Then PdCl<sub>2</sub> (10 mol %) was added to the mixture. After completion of reaction as indicated by TLC, the solvent was evaporated and the residue was quenched with water (10 mL), extracted with EtOAc (2 × 10 mL), dried by anhydrous Na<sub>2</sub>SO<sub>4</sub>. Evaporation of the solvent followed by purification on silica gel provided the corresponding product **3**.

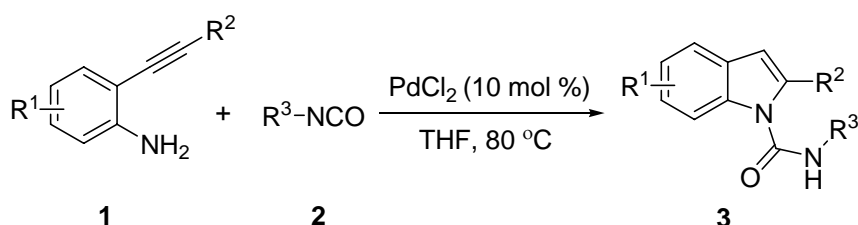

### *N,2-Diphenyl-1H-indole-1-carboxamide 3a*

Yield: 87%; <sup>1</sup>H NMR (400 MHz, CDCl<sub>3</sub>) δ 6.69 (s, 1H), 6.72 (br, 1H), 7.04 - 7.08 (m, 3H), 7.20 - 7.27 (m, 3H), 7.33 (dt, *J* = 1.5, 7.82 Hz, 1H), 7.42 - 7.47 (m, 3H), 7.54 - 7.56 (m, 2H), 7.59 (d, *J* = 7.8 Hz, 1H), 8.20 (d, *J* = 8.3 Hz, 1H); <sup>13</sup>C NMR (100 MHz, CDCl<sub>3</sub>) δ 109.1, 114.3, 119.6, 120.6, 122.7, 124.4, 124.6, 128.6, 128.8, 128.9, 129.1, 132.0, 136.7, 137.6, 137.9, 149.4; MS (ESI) *m/z* 313 (M<sup>+</sup>+H); HRMS calcd for C<sub>21</sub>H<sub>16</sub>N<sub>2</sub>O (M<sup>+</sup>+H): 313.1341; Found: 313.1372.

*2-(4-Methoxyphenyl)-N-phenyl-1H-indole-1-carboxamide 3b:* Yield: 53%; <sup>1</sup>H NMR (400 MHz, CDCl<sub>3</sub>) δ 3.85 (s, 3H), 6.64 (s, 1H), 6.82 (br, 1H), 6.99 (d, *J* = 8.8 Hz, 2H), 7.06 - 7.13 (m, 3H), 7.23 - 7.27 (m, 3H), 7.33 (t, *J* = 7.3 Hz, 1H), 7.50 (d, *J* = 8.8 Hz, 2H), 7.58 (d, *J* = 7.8 Hz, 1H), 8.23 (d, *J* = 8.3 Hz, 1H); <sup>13</sup>C NMR (100 MHz, CDCl<sub>3</sub>) δ 55.4, 108.6, 114.5, 114.6, 119.7, 120.4,

122.7, 124.2, 124.3, 124.6, 128.7, 129.0, 130.3, 136.8, 137.4, 137.8, 149.5, 160.2; MS (ESI)  $m/z$  343 ( $M^+ + H$ ); HRMS calcd for  $C_{22}H_{18}N_2O_2$  ( $M^+ + H$ ): 343.1447; Found: 343.1470.

*N,2-Diphenyl-5-(trifluoromethyl)-1H-indole-1-carboxamide 3c*: Yield: 46%;  $^1H$  NMR (400 MHz,  $CDCl_3$ )  $\delta$  6.75 (br, 1H), 6.77 (s, 1H), 7.04 - 7.12 (m, 3H), 7.23 - 7.27 (m, 2H), 7.49 - 7.51 (m, 3H), 7.56 - 7.59 (m, 3H), 7.89 (s, 1H), 8.30 (d,  $J = 8.3$  Hz, 1H);  $^{13}C$  NMR (100 MHz,  $CDCl_3$ )  $\delta$  108.9, 114.9, 118.1 (q,  $^3J_{CF} = 3.8$  Hz), 119.7, 121.1 (q,  $^3J_{CF} = 3.8$  Hz), 124.8 (q,  $^1J_{CF} = 270.8$  Hz), 124.9, 125.0 (q,  $^2J_{CF} = 31.5$  Hz), 128.2, 129.0, 129.1, 129.3, 129.5, 131.3, 136.4, 139.3, 148.9; MS (ESI)  $m/z$  381 ( $M^+ + H$ ); HRMS calcd for  $C_{22}H_{15}F_3N_2O$  ( $M^+ + H$ ): 381.1215; Found: 381.1251.

*5-Methyl-N,2-diphenyl-1H-indole-1-carboxamide 3d*: Yield: 74%;  $^1H$  NMR (400 MHz,  $CDCl_3$ )  $\delta$  2.45 (s, 3H), 6.62 (s, 1H), 6.70 (br, 1H), 7.04 - 7.06 (m, 3H), 7.15 (d,  $J = 8.3$  Hz, 1H), 7.22 (t,  $J = 7.8$  Hz, 2H), 7.37 (s, 1H), 7.42 - 7.48 (m, 3H), 7.54 - 7.56 (m, 2H), 8.10 (d,  $J = 8.3$  Hz, 1H);  $^{13}C$  NMR (100 MHz,  $CDCl_3$ )  $\delta$  21.3, 109.1, 114.2, 119.6, 120.4, 124.5, 126.0, 128.9, 129.0, 129.1, 132.1, 132.2, 136.2, 136.8, 137.6, 149.5; MS (ESI)  $m/z$  327 ( $M^+ + H$ ); HRMS calcd for  $C_{22}H_{18}N_2O$  ( $M^+ + H$ ): 327.1497; Found: 327.1527.

*2-Cyclopropyl-N-phenyl-1H-indole-1-carboxamide 3e*: Yield: 90%;  $^1H$  NMR (400 MHz,  $CDCl_3$ )  $\delta$  1.71 - 1.75 (m, 2H), 1.87 - 1.91 (m, 2H), 2.90 - 3.00 (m, 1H), 7.03 (s, 1H), 7.89 - 7.93 (m, 2H), 7.96 - 8.00 (m, 1H), 8.13 (t,  $J = 8.3$  Hz, 2H), 8.20 (d,  $J = 8.3$  Hz, 1H), 8.32 (d,  $J = 8.3$  Hz, 2H), 8.83 (d,  $J = 8.3$  Hz, 1H), 9.05 (br, 1H);  $^{13}C$  NMR (100 MHz,  $CDCl_3$ )  $\delta$  8.2, 10.3, 105.4, 114.1, 119.6, 120.1, 122.3, 123.6, 124.5, 128.4, 129.2, 137.0, 137.3, 140.0, 149.8; MS (ESI)  $m/z$  277 ( $M^+ + H$ ); HRMS calcd for  $C_{18}H_{16}N_2O$  ( $M^+ + H$ ): 277.1341; Found: 277.1358.

*N-(4-Fluorophenyl)-2-phenyl-1H-indole-1-carboxamide 3f*: Yield: 75%;  $^1H$  NMR (400 MHz,  $CDCl_3$ )  $\delta$  6.69 (br, 1H), 6.70 (s, 1H), 6.91 (t,  $J = 8.7$  Hz, 2H), 6.98 - 7.02 (m, 2H), 7.24 - 7.28 (m, 1H), 7.34 (dt,  $J = 1.5, 8.3$  Hz, 1H), 7.44 - 7.49 (m, 3H), 7.54 - 7.57 (m, 2H), 7.59 (d,  $J = 7.8$  Hz, 1H), 8.19 (d,  $J = 8.3$  Hz, 1H);  $^{13}C$  NMR (100 MHz,  $CDCl_3$ )  $\delta$  109.3, 114.4, 115.6 (d,  $^2J_{CF} = 22.9$  Hz), 120.6, 121.4 (d,  $^3J_{CF} = 7.6$  Hz), 122.8, 124.6, 128.6, 128.9, 129.0, 129.1, 132.0, 132.7 (d,  $^4J_{CF} = 2.8$  Hz), 137.5, 137.9, 149.5, 159.6 (d,  $^1J_{CF} = 243.1$  Hz); MS (ESI)  $m/z$  331 ( $M^+ + H$ ); HRMS calcd for  $C_{21}H_{15}FN_2O$  ( $M^+ + H$ ): 331.1247; Found: 331.1271.

*N-(4-Fluorophenyl)-2-(4-methoxyphenyl)-1H-indole-1-carboxamide 3g*: Yield: 65%;  $^1H$  NMR (400 MHz,  $CDCl_3$ )  $\delta$  3.86 (s, 3H), 6.64 (s, 1H), 6.81 (br, 1H), 6.94 (t,  $J = 8.3$  Hz, 2H), 7.00 (d,  $J = 8.8$  Hz, 2H), 7.05 - 7.09 (m, 2H), 7.25 (dt,  $J = 1.5, 8.3$  Hz, 1H), 7.33 (dt,  $J = 1.5, 8.3$

Hz, 1H ), 7.49 (d,  $J = 8.8$  Hz, 2H ), 7.58 (d,  $J = 7.8$  Hz, 1H ), 8.21 (d,  $J = 8.3$  Hz, 1H );  $^{13}\text{C}$  NMR (100 MHz,  $\text{CDCl}_3$ )  $\delta$  55.4, 108.7, 114.4, 114.6, 115.6 (d,  $^2J_{\text{CF}} = 22.9$  Hz ), 120.4, 121.5 (d,  $^3J_{\text{CF}} = 8.6$  Hz ), 122.7, 124.1, 124.3, 128.7, 130.3, 132.8, 137.3, 137.8, 149.7, 159.6 (d,  $^1J_{\text{CF}} = 242.1$  Hz ), 160.2; MS (ESI)  $m/z$  383 ( $\text{M}^+\text{+Na}$ ); HRMS calcd for  $\text{C}_{22}\text{H}_{17}\text{FN}_2\text{O}_2$  ( $\text{M}^+\text{+Na}$ ): 383.1172; Found: 383.1200.

*N*-(4-Fluorophenyl)-2-phenyl-5-(trifluoromethyl)-1*H*-indole-1-carboxamide **3h**: Yield: 60%;  $^1\text{H}$  NMR (400 MHz,  $\text{CDCl}_3$ )  $\delta$  6.70(br,1H), 6.77(s,1H), 6.91-7.00(m,4H), 7.50-7.52(m,3H), 7.56-7.58(m,3H), 7.89(s,1H), 8.28(d, $J=8.8\text{Hz}$ ,1H);  $^{13}\text{C}$  NMR (100 MHz,  $\text{CDCl}_3$ )  $\delta$  109.0, 114.8, 115.8 (d,  $^2J_{\text{CF}} = 22.9$  Hz ), 118.1 (q,  $^3J_{\text{CF}} = 3.8$  Hz ), 121.1 (q,  $^3J_{\text{CF}} = 3.1$  Hz ), 121.6 (d,  $^3J_{\text{CF}} = 7.6$  Hz ), 124.7 (q,  $^1J_{\text{CF}} = 270.2$  Hz ), 125.2 (q,  $^2J_{\text{CF}} = 32.1$  Hz ), 128.1, 129.1, 129.4, 129.6, 131.3, 132.3, 139.1, 139.2, 149.0, 159.8 (d,  $^1J_{\text{CF}} = 243.4$  Hz ); MS (ESI)  $m/z$  399 ( $\text{M}^+\text{+H}$ ); HRMS calcd for  $\text{C}_{22}\text{H}_{14}\text{F}_4\text{N}_2\text{O}$  ( $\text{M}^+\text{+H}$ ): 399.1121; Found: 399.1150.

*N*-(4-Fluorophenyl)-5-methyl-2-phenyl-1*H*-indole-1-carboxamide **3i**: Yield: 72%;  $^1\text{H}$  NMR (400 MHz,  $\text{CDCl}_3$ )  $\delta$  2.45 (s, 3H ), 6.62 (s, 1H ), 6.68 (br, 1H ), 6.90 (t,  $J = 8.8$  Hz, 2H ), 6.98 - 7.01 (m, 2H ), 7.15 (d,  $J = 8.3$  Hz, 1H ), 7.37 (s, 1H ), 7.42 - 7.48 (m, 3H ), 7.52 - 7.55 (m, 2H ), 8.07 (d,  $J = 8.3$  Hz, 1H );  $^{13}\text{C}$  NMR (100 MHz,  $\text{CDCl}_3$ )  $\delta$  21.4, 109.3, 114.2, 115.7 (d,  $^2J_{\text{CF}} = 21.9$  Hz ), 120.5, 121.6 (d,  $^3J_{\text{CF}} = 7.6$  Hz ), 126.2, 129.0, 129.2, 132.3, 132.4, 132.9 (d,  $^4J_{\text{CF}} = 2.8$  Hz ), 136.3, 137.6, 149.8, 159.7 (d,  $^1J_{\text{CF}} = 243.1$  Hz ); MS (ESI)  $m/z$  345 ( $\text{M}^+\text{+H}$ ); HRMS calcd for  $\text{C}_{22}\text{H}_{17}\text{FN}_2\text{O}$  ( $\text{M}^+\text{+H}$ ): 345.1403; Found: 345.1432.

2-Cyclopropyl-*N*-(4-fluorophenyl)-1*H*-indole-1-carboxamide **3j**: Yield: 72%;  $^1\text{H}$  NMR (400 MHz,  $\text{CDCl}_3$ )  $\delta$  0.97 - 1.01 (m, 2H ), 1.12 - 1.17 (m, 2H ), 2.15 - 2.24 (m, 1H ), 6.30 (s, 1H ), 7.08 (t,  $J = 7.3$  Hz, 2H ), 7.18 (dt,  $J = 1.3, 7.8$  Hz, 1H ), 7.25 (dt,  $J = 1.5, 8.6$  Hz, 1H ), 7.47 (d,  $J = 7.3$  Hz, 1H ), 7.52 - 7.55 (m, 2H ), 8.08 (d,  $J = 8.3$  Hz, 1H ), 8.33 (br, 1H );  $^{13}\text{C}$  NMR (100 MHz,  $\text{CDCl}_3$ )  $\delta$  8.2, 10.4, 105.7, 114.4, 115.9 (d,  $^2J_{\text{CF}} = 21.9$  Hz ), 120.1, 121.4 (d,  $^3J_{\text{CF}} = 8.6$  Hz ), 122.4, 123.7, 128.4, 133.3 (d,  $^4J_{\text{CF}} = 2.8$  Hz ), 137.0, 139.9, 150.0, 159.5 (d,  $^1J_{\text{CF}} = 242.1$  Hz ); MS (ESI)  $m/z$  317 ( $\text{M}^+\text{+Na}$ ); HRMS calcd for  $\text{C}_{18}\text{H}_{15}\text{FN}_2\text{O}$  ( $\text{M}^+\text{+Na}$ ): 317.1066; Found: 317.1092.

*N*-(4-Methoxyphenyl)-2-phenyl-1*H*-indole-1-carboxamide **3k**: Yield: 86%;  $^1\text{H}$  NMR (400 MHz,  $\text{CDCl}_3$ )  $\delta$  3.73 (s, 1H ), 6.61 (br, 1H ), 6.69 (s, 1H ), 6.75 (d,  $J = 8.8$  Hz, 2H ), 6.97 (d,  $J = 8.3$  Hz, 2H ), 7.24 (t,  $J = 7.3$  Hz, 1H ), 7.32 (dt,  $J = 1.5, 8.3$  Hz, 1H ), 7.42 - 7.47 (m, 3H ), 7.54 - 7.60 (m, 3H ), 8.18 (d,  $J = 8.3$  Hz, 1H );  $^{13}\text{C}$  NMR (100 MHz,  $\text{CDCl}_3$ )  $\delta$  55.4, 108.8, 114.1, 114.2, 120.6,

121.7, 122.6, 124.4, 128.6, 128.8, 129.0, 129.7, 132.0, 137.6, 137.9, 149.6, 156.7; MS (ESI)  $m/z$  343 ( $M^+ + H$ ); HRMS calcd for  $C_{22}H_{18}N_2O_2$  ( $M^+ + H$ ): 343.1477; Found: 343.1487.

*N,2-Bis(4-methoxyphenyl)-1H-indole-1-carboxamide 3l*: Yield: 73%;  $^1H$  NMR (400 MHz,  $CDCl_3$ )  $\delta$  3.75 (s, 3H), 3.85 (s, 3H), 6.62 (s, 1H), 6.70 (br, 1H), 6.78 (d,  $J = 8.8$  Hz, 2H), 6.99 (d,  $J = 8.8$  Hz, 2H), 7.03 (d,  $J = 8.3$  Hz, 2H), 7.24 (d,  $J = 7.3$  Hz, 1H), 7.31 (dt,  $J = 1.0, 8.3$  Hz, 1H), 7.49 (d,  $J = 8.3$  Hz, 2H), 7.57 (d,  $J = 7.8$  Hz, 1H), 8.20 (d,  $J = 8.3$  Hz, 1H);  $^{13}C$  NMR (100 MHz,  $CDCl_3$ )  $\delta$  55.4, 108.3, 114.1, 114.4, 114.5, 120.3, 121.7, 122.6, 124.1, 124.2, 128.7, 129.8, 130.2, 137.5, 137.8, 149.8, 156.7, 160.1; MS (ESI)  $m/z$  373 ( $M^+ + H$ ); HRMS calcd for  $C_{23}H_{20}N_2O_3$  ( $M^+ + H$ ): 373.1552; Found: 373.1579.

*N-(4-Methoxyphenyl)-2-phenyl-5-(trifluoromethyl)-1H-indole-1-carboxamide 3m*: Yield: 43%;  $^1H$  NMR (400 MHz,  $CDCl_3$ )  $\delta$  3.76 (s, 3H), 6.62 (br, 1H), 6.76 - 6.79 (m, 3H), 6.98 (d,  $J = 7.3$  Hz, 2H), 7.49 - 7.51 (m, 3H), 7.55 - 7.58 (m, 3H), 7.89 (s, 1H), 7.28 (d,  $J = 8.8$  Hz, 1H);  $^{13}C$  NMR (100 MHz,  $CDCl_3$ )  $\delta$  55.5, 108.8, 114.3, 114.8, 118.2 (q,  $^3J_{CF} = 4.7$  Hz), 121.1 (q,  $^3J_{CF} = 2.9$  Hz), 121.9, 124.9 (q,  $^1J_{CF} = 269.8$  Hz), 125.1 (q,  $^2J_{CF} = 31.5$  Hz), 128.2, 129.1, 129.5, 129.7, 131.5, 139.3, 139.4, 149.3, 157.1; MS (ESI)  $m/z$  433 ( $M^+ + Na$ ); HRMS calcd for  $C_{23}H_{17}F_3N_2O_2$  ( $M^+ + Na$ ): 433.1140; Found: 433.1173.

*N-(4-Methoxyphenyl)-5-methyl-2-phenyl-1H-indole-1-carboxamide 3n*: Yield: 83%;  $^1H$  NMR (400 MHz,  $CDCl_3$ )  $\delta$  2.44 (s, 3H), 3.73 (s, 3H), 6.60 (br, 1H), 6.61 (s, 1H), 6.75 (d,  $J = 8.8$  Hz, 2H), 6.97 (d,  $J = 8.8$  Hz, 2H), 7.14 (d,  $J = 8.1$  Hz, 1H), 7.36 (s, 1H), 7.41 - 7.46 (m, 3H), 7.51 - 7.55 (m, 2H), 8.06 (d,  $J = 8.3$  Hz, 1H);  $^{13}C$  NMR (100 MHz,  $CDCl_3$ )  $\delta$  21.3, 55.4, 108.8, 114.0, 114.1, 120.3, 121.6, 125.9, 128.7, 128.8, 129.0, 129.8, 132.0, 132.2, 136.2, 137.6, 149.7, 156.6; MS (ESI)  $m/z$  357 ( $M^+ + H$ ); HRMS calcd for  $C_{23}H_{20}N_2O_2$  ( $M^+ + H$ ): 357.1603; Found: 357.1629.

*2-Cyclopropyl-N-(4-methoxyphenyl)-1H-indole-1-carboxamide 3o*: Yield: 88%;  $^1H$  NMR (400 MHz,  $CDCl_3$ )  $\delta$  0.94 - 0.98 (m, 2H), 1.10 - 1.05 (m, 2H), 2.16 - 2.24 (m, 1H), 3.80 (s, 3H), 6.27 (s, 1H), 6.91 (d,  $J = 9.3$  Hz, 2H), 7.16 (t,  $J = 7.3$  Hz, 1H), 7.23 (t,  $J = 7.8$  Hz, 1H), 7.46 (t,  $J = 8.8$  Hz, 3H), 8.07 (d,  $J = 8.3$  Hz, 1H), 8.17 (br, 1H);  $^{13}C$  NMR (100 MHz,  $CDCl_3$ )  $\delta$  8.2, 10.3, 55.5, 105.2, 114.0, 114.4, 120.0, 121.6, 122.2, 123.5, 128.4, 130.3, 137.0, 140.1, 150.1, 156.7; MS (ESI)  $m/z$  307 ( $M^+ + H$ ); HRMS calcd for  $C_{19}H_{18}N_2O_2$  ( $M^+ + H$ ): 307.1447; Found: 307.1473.

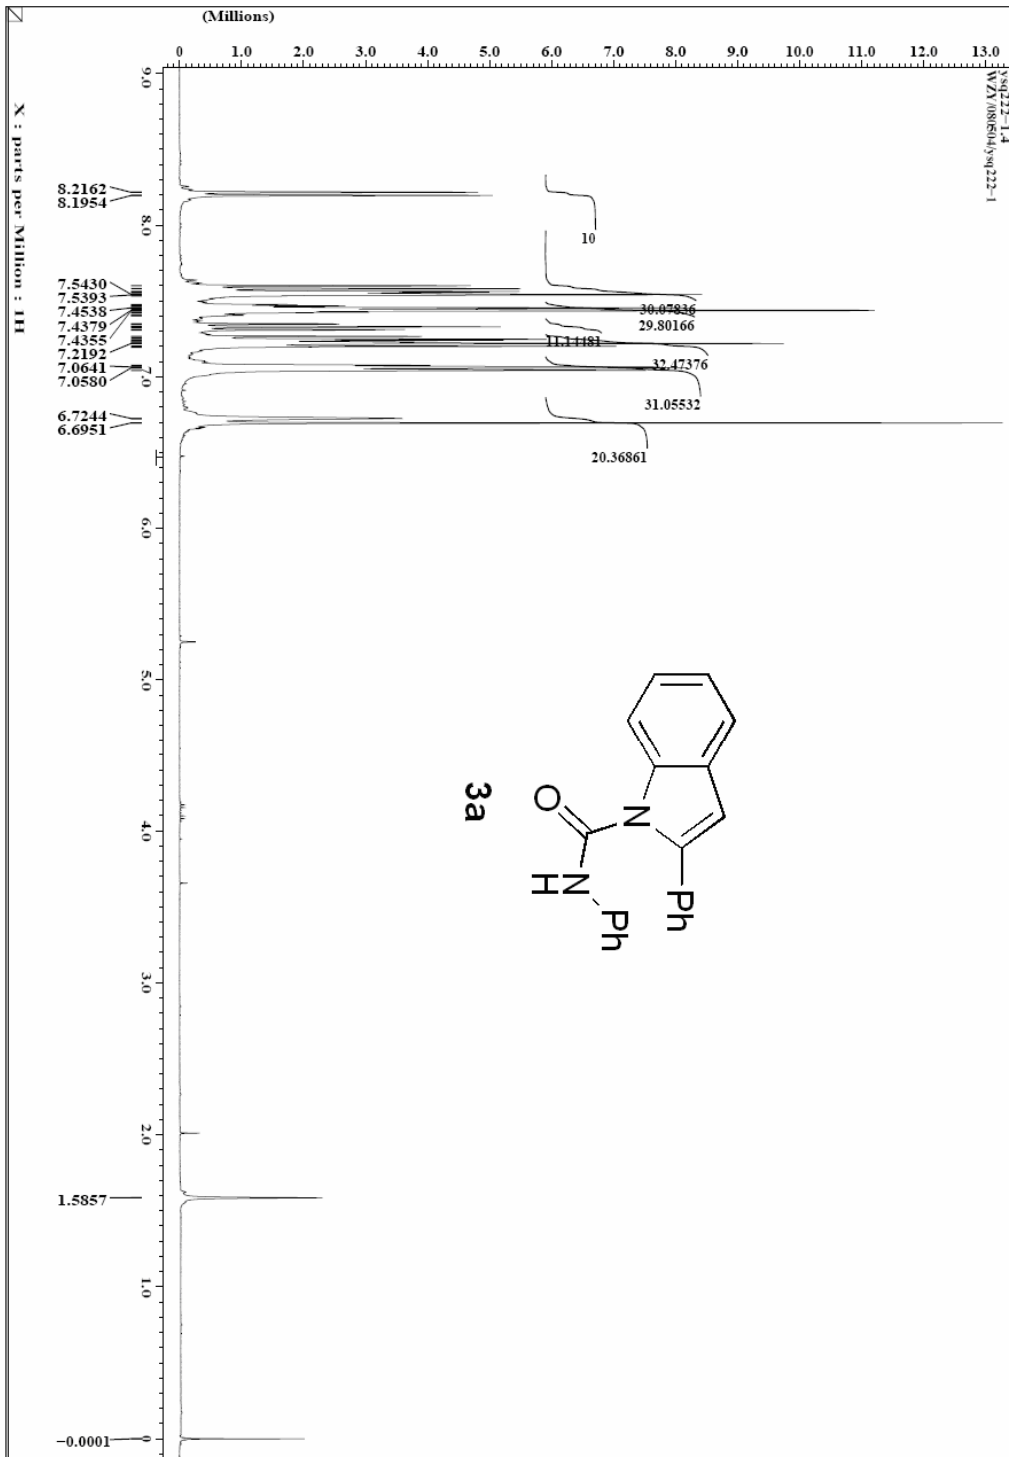

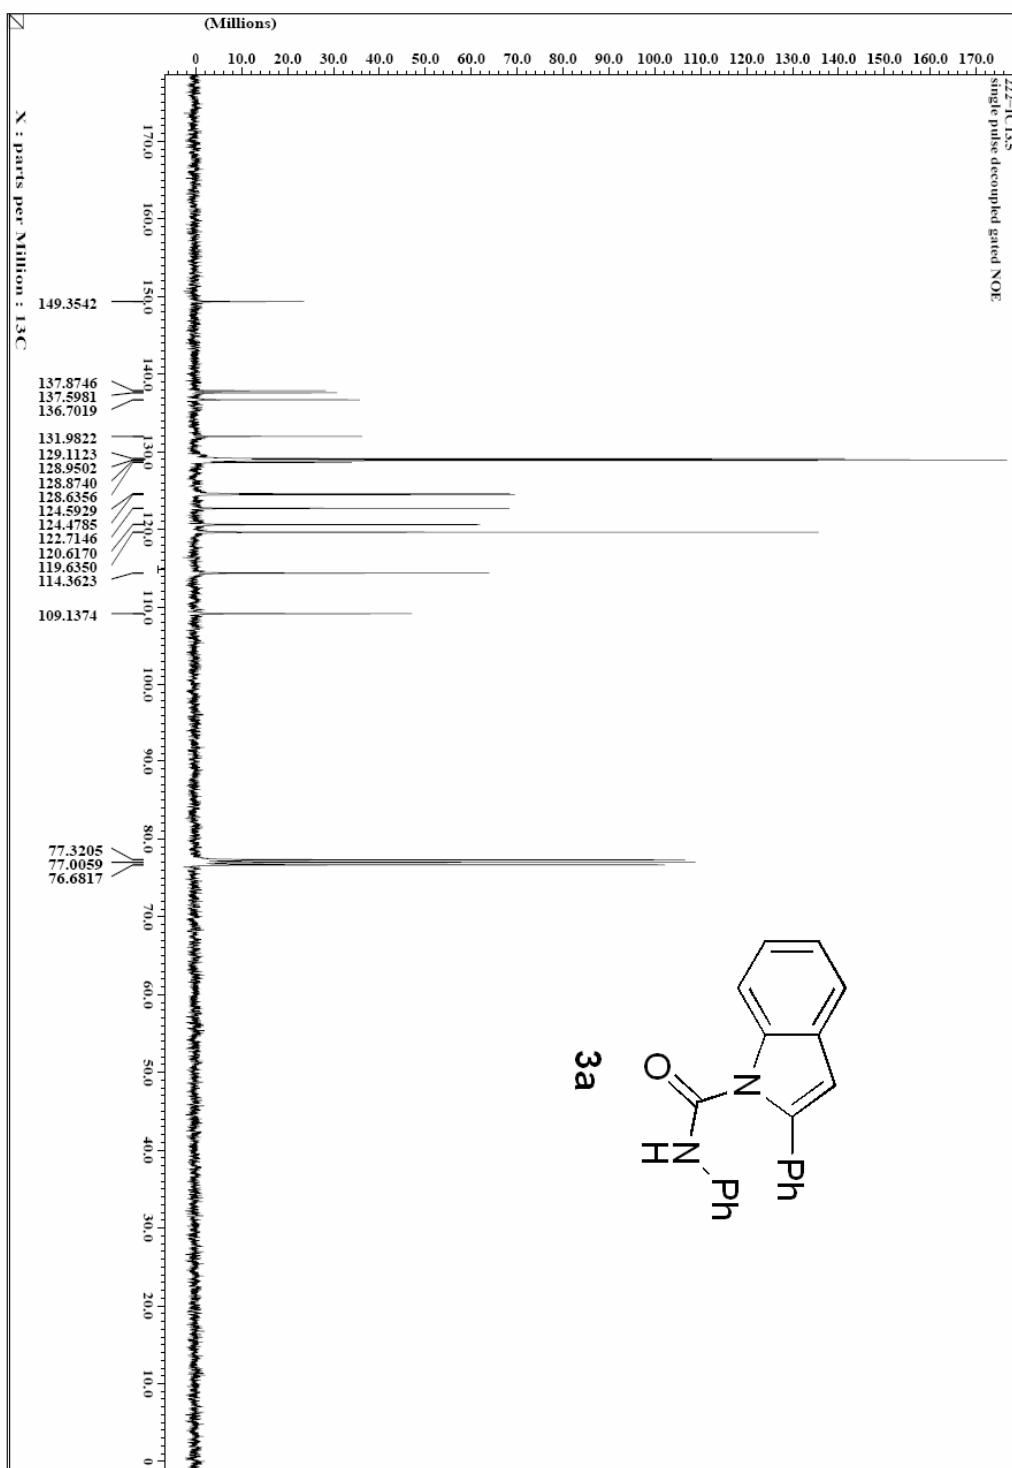

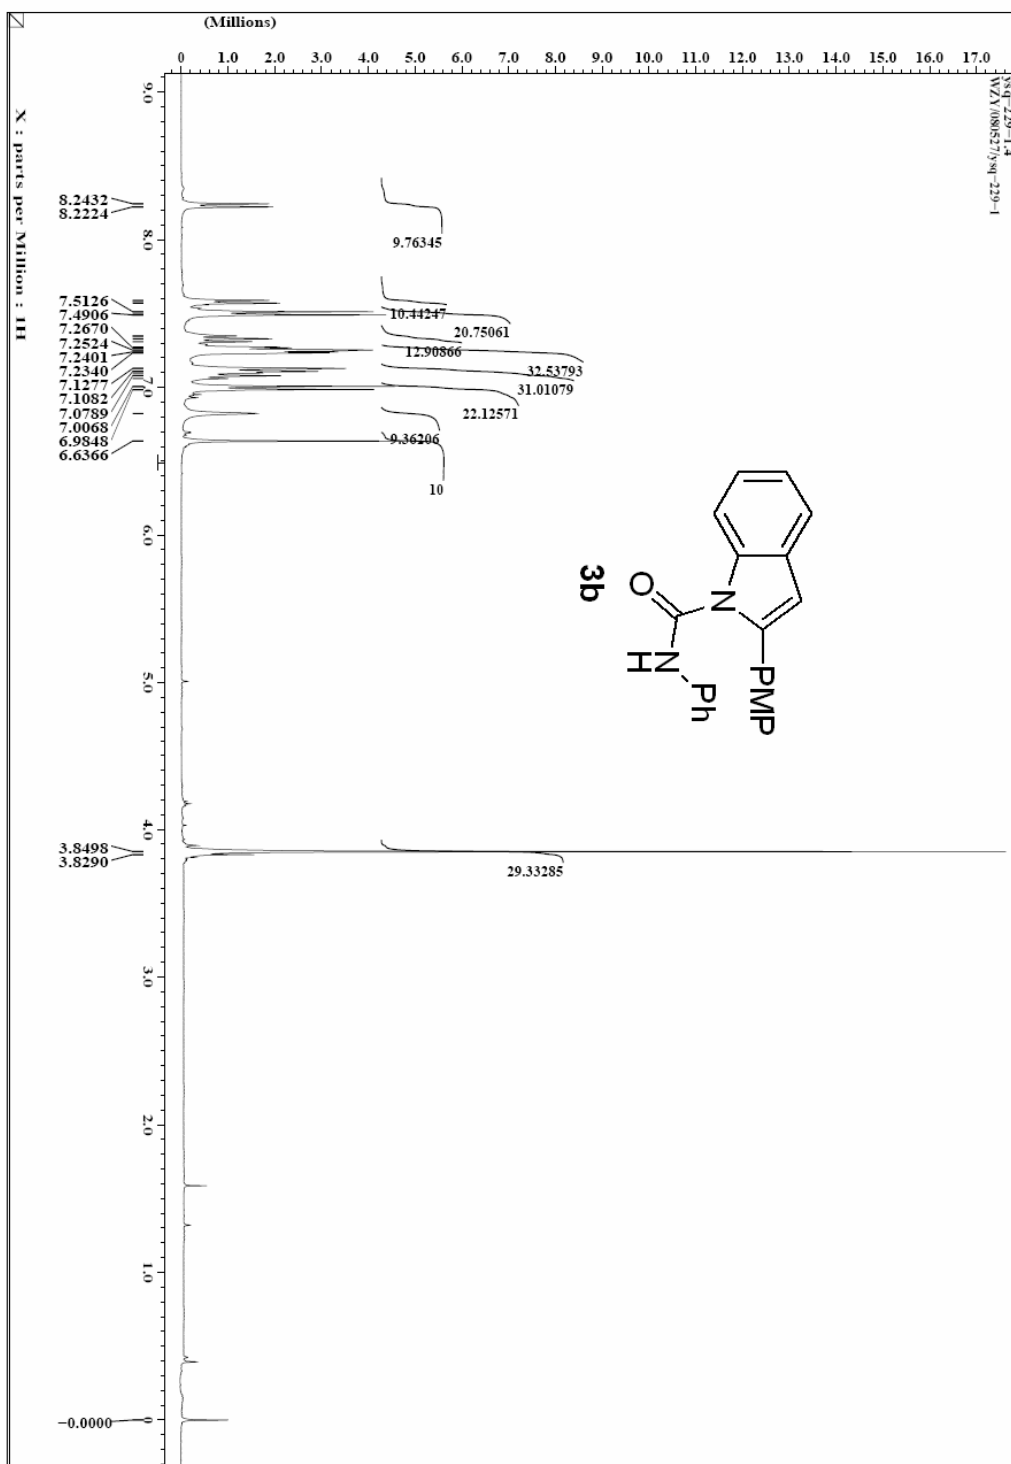



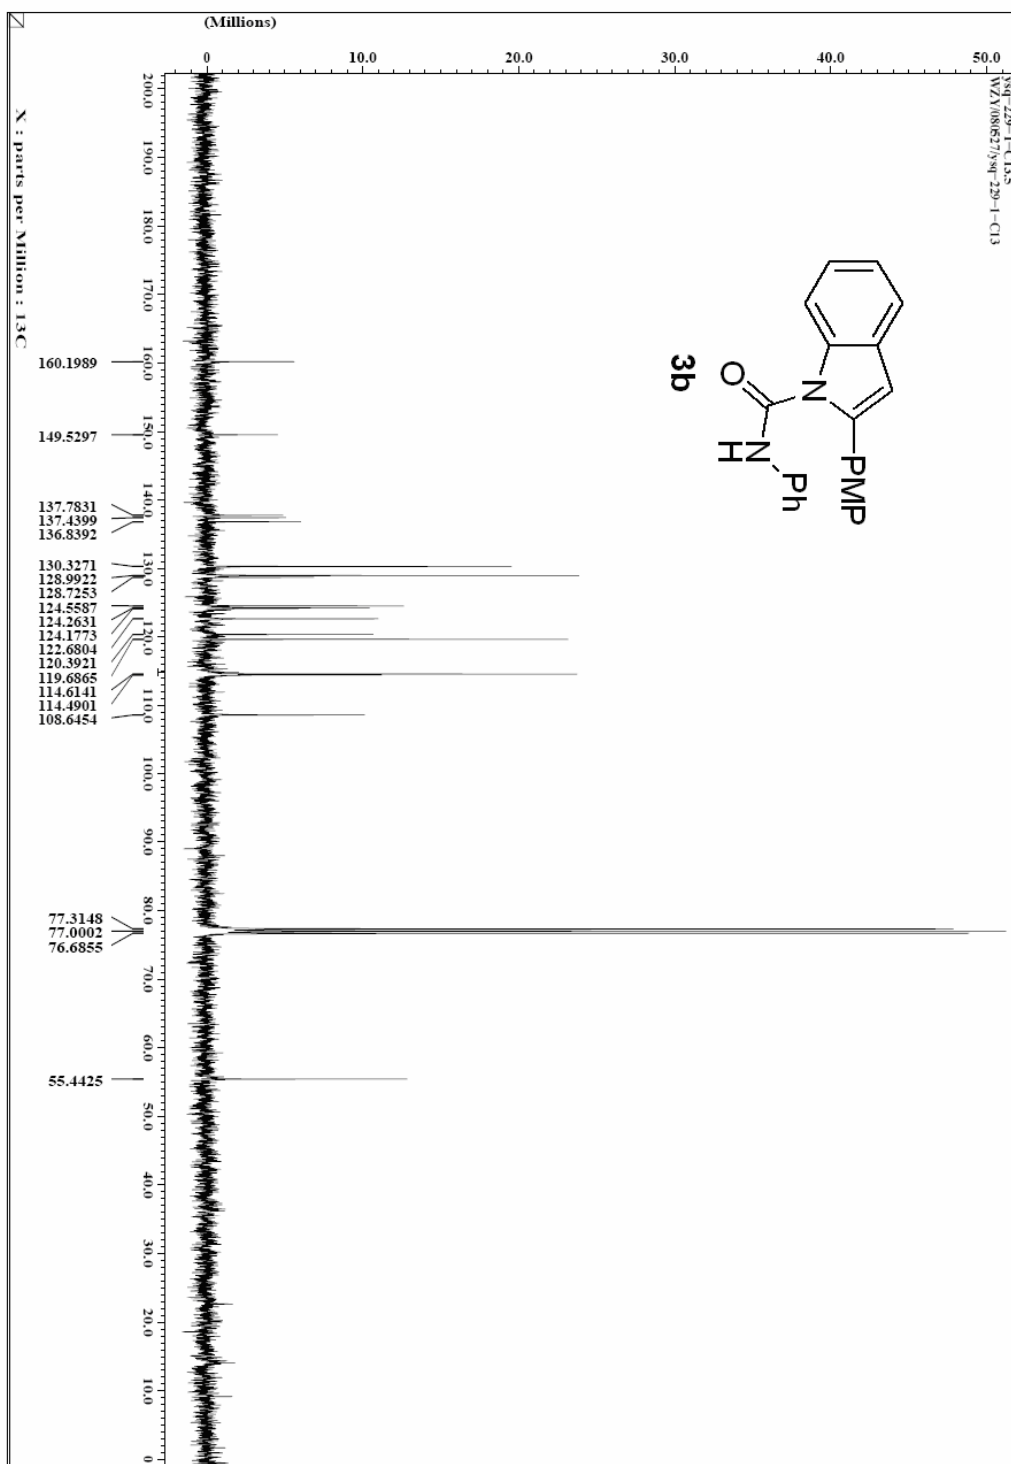

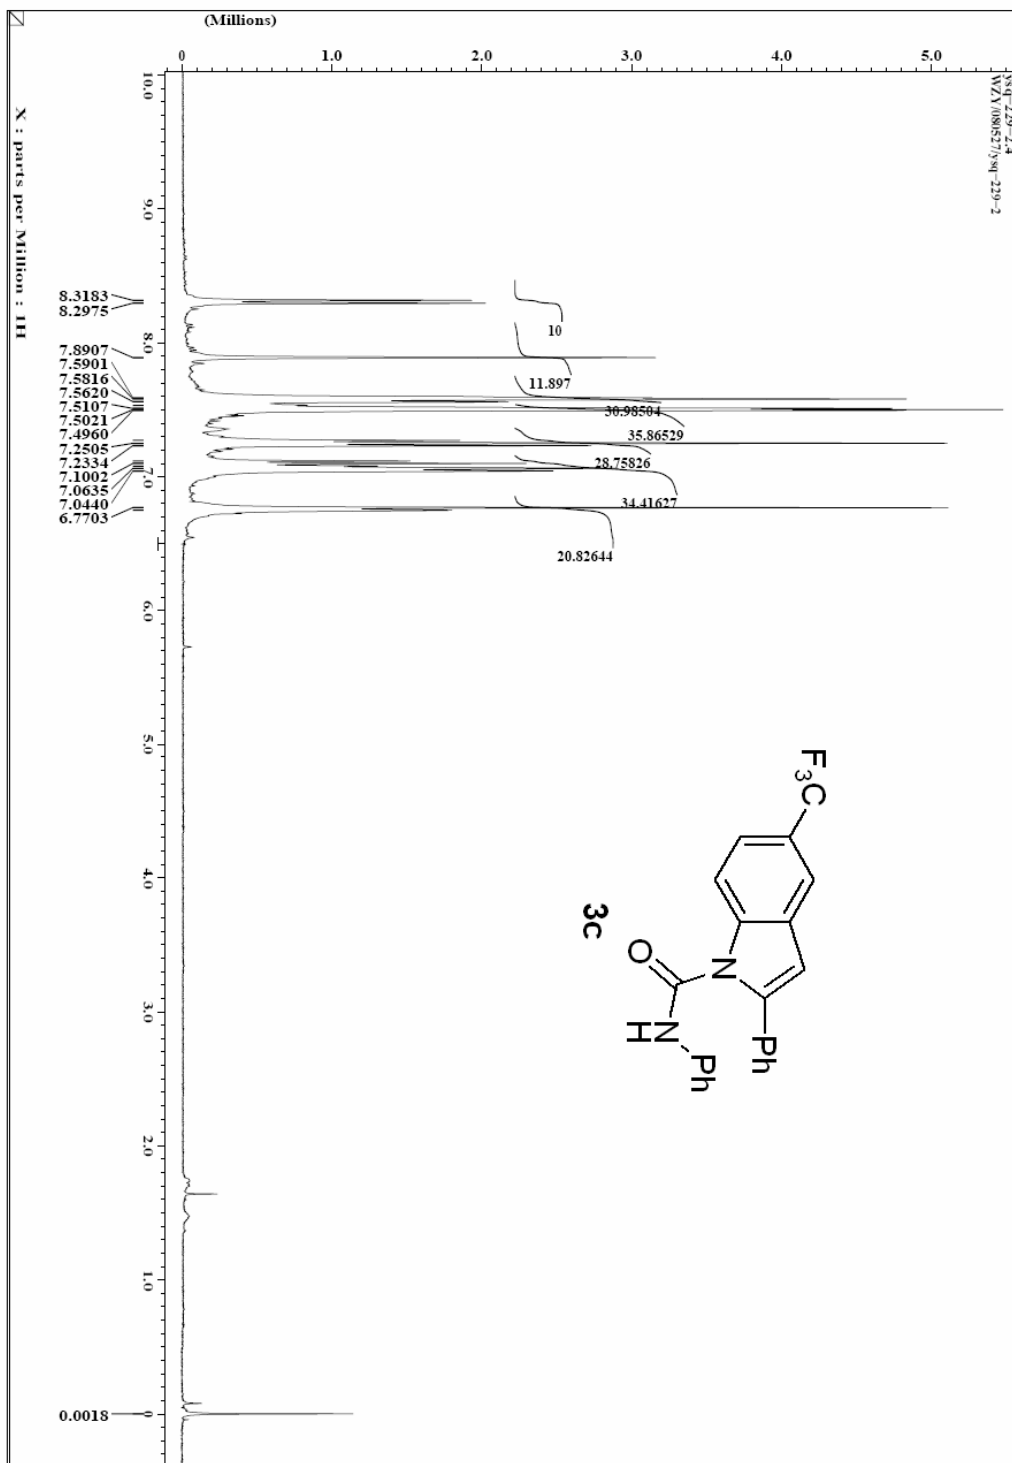

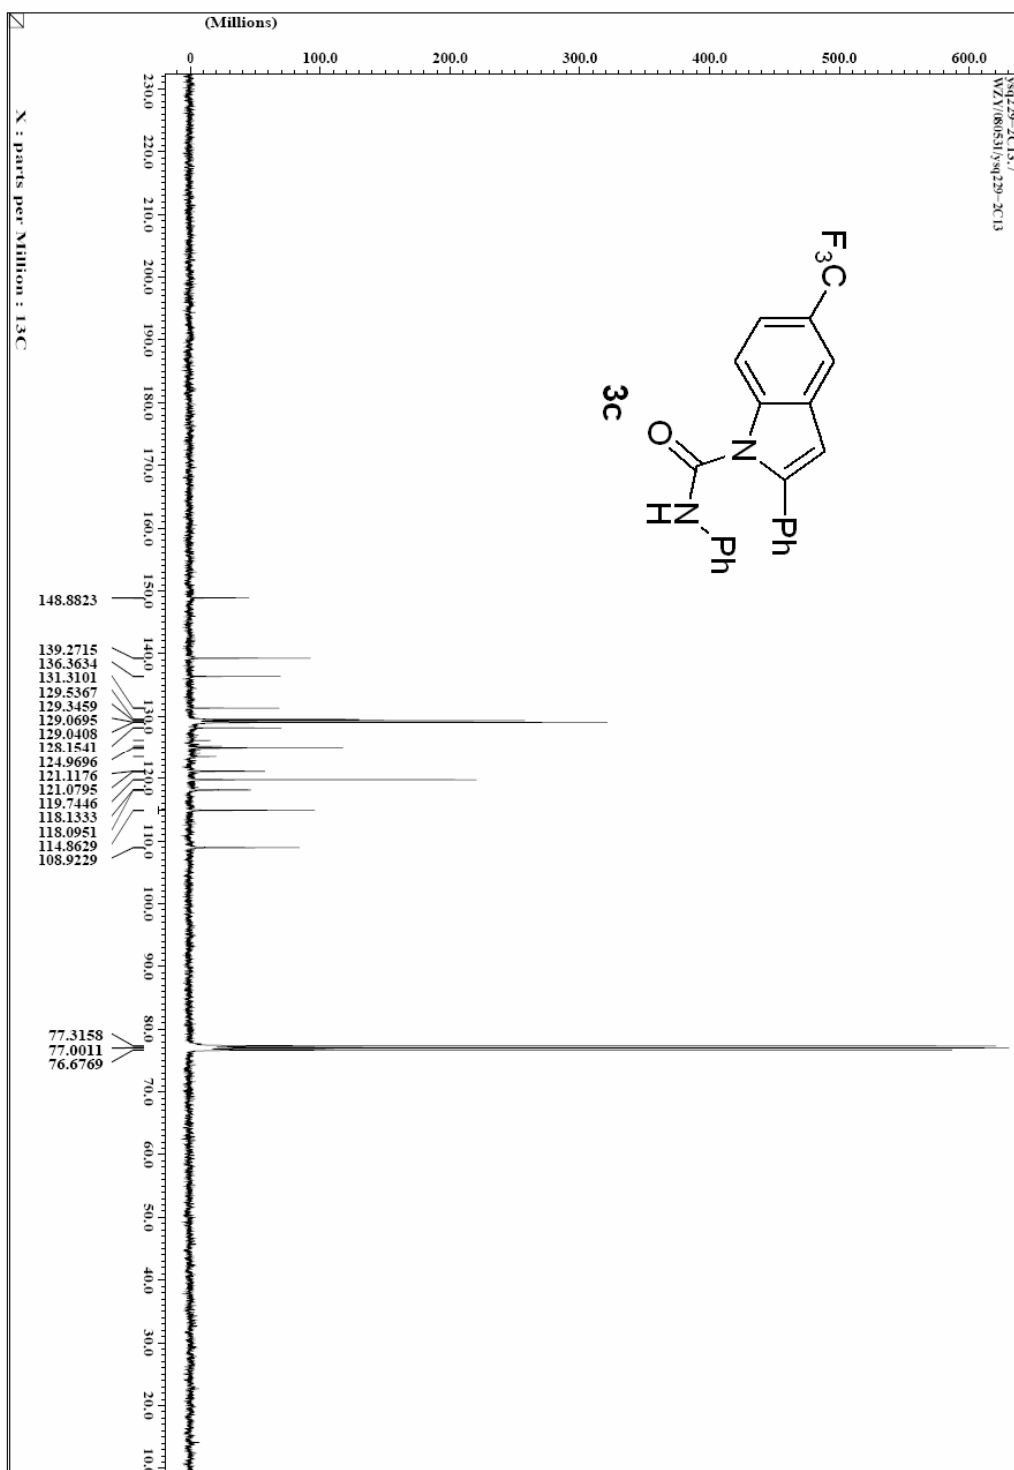



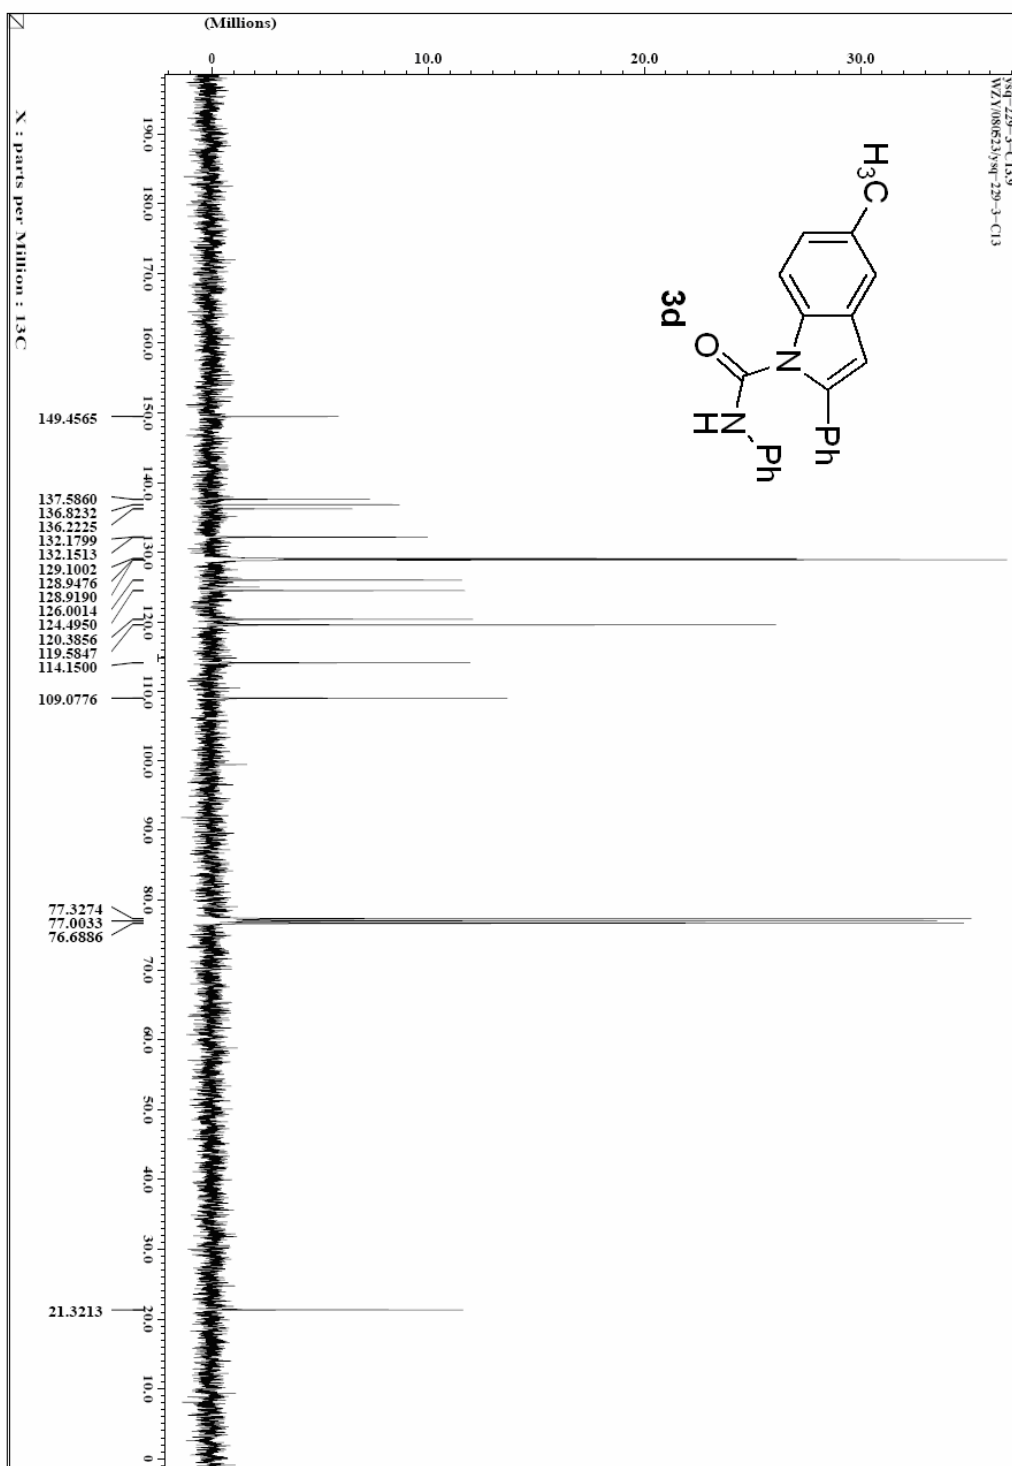

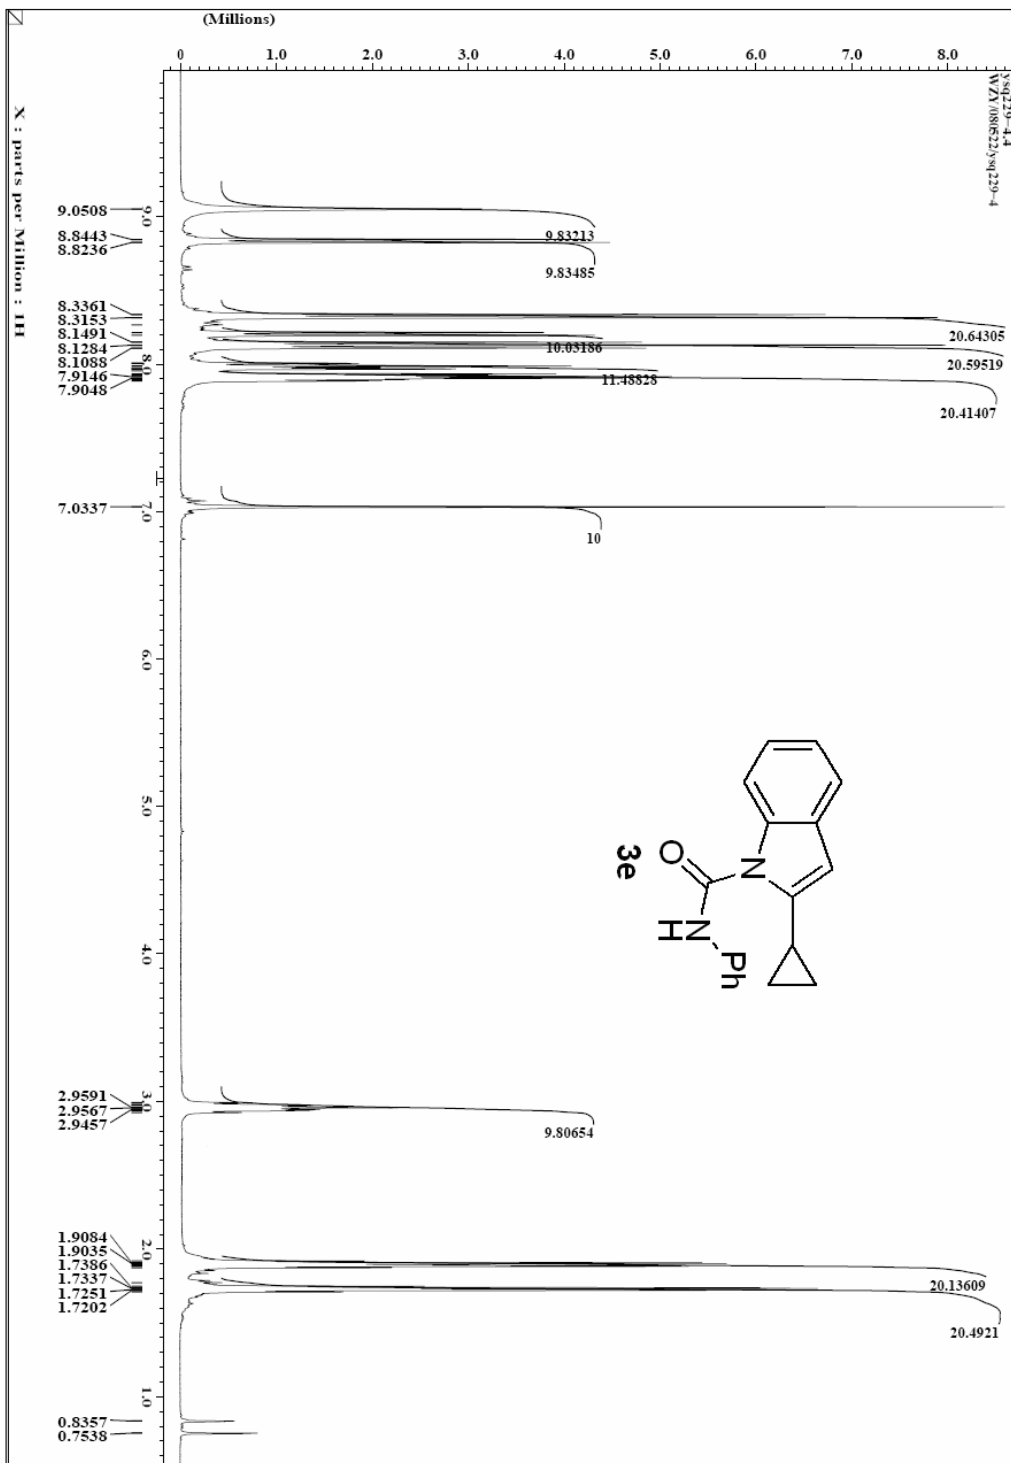

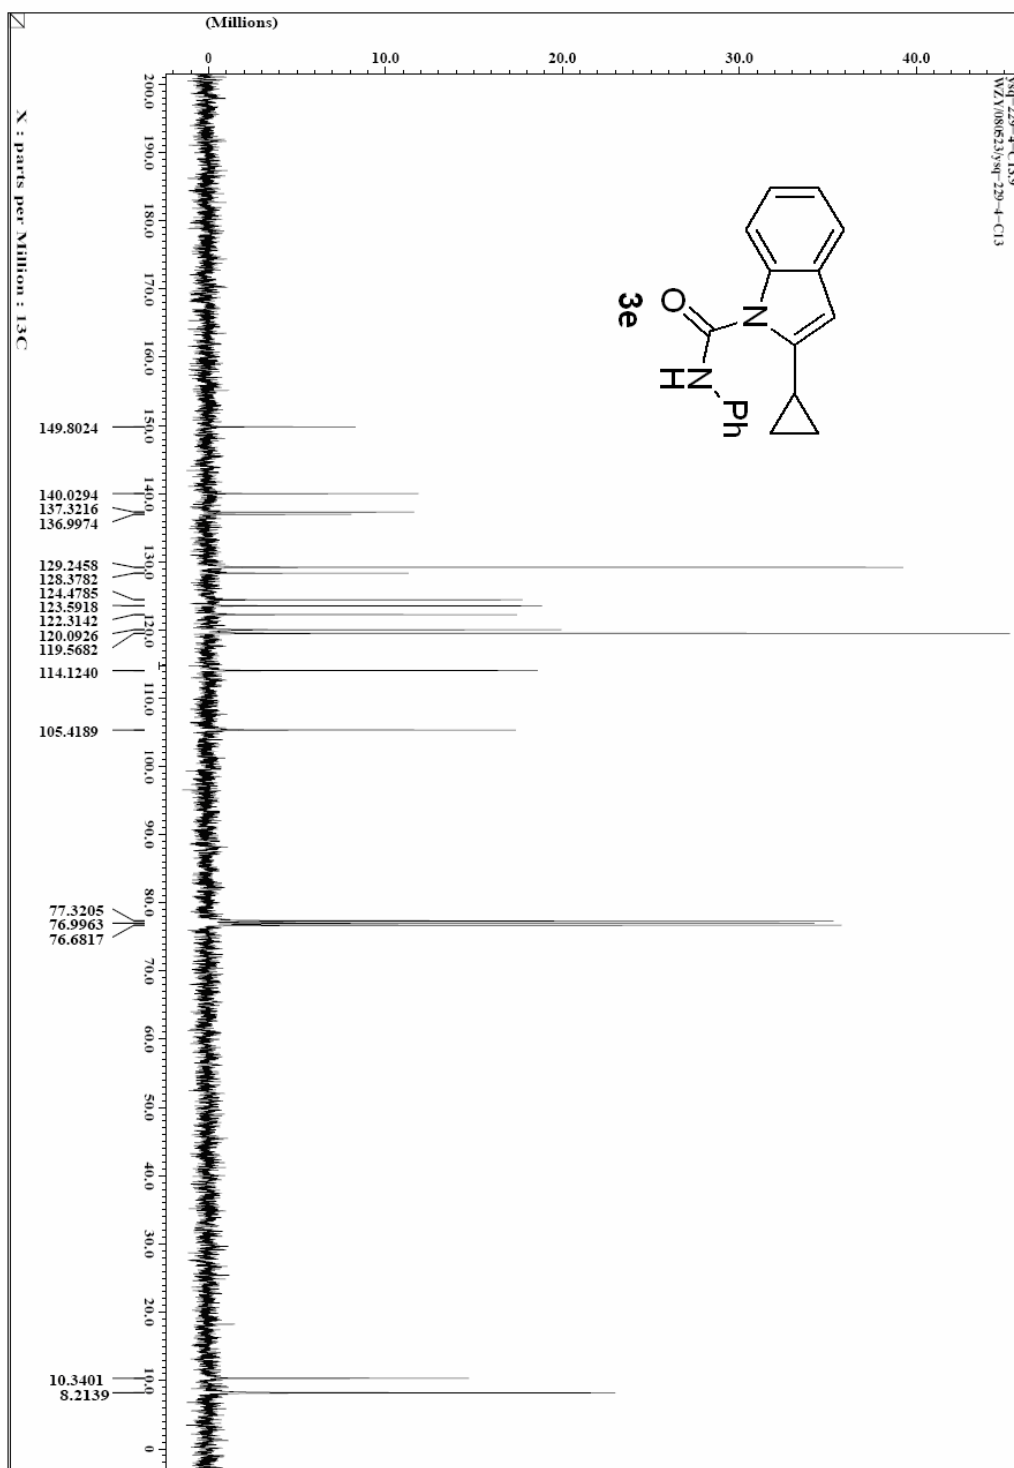

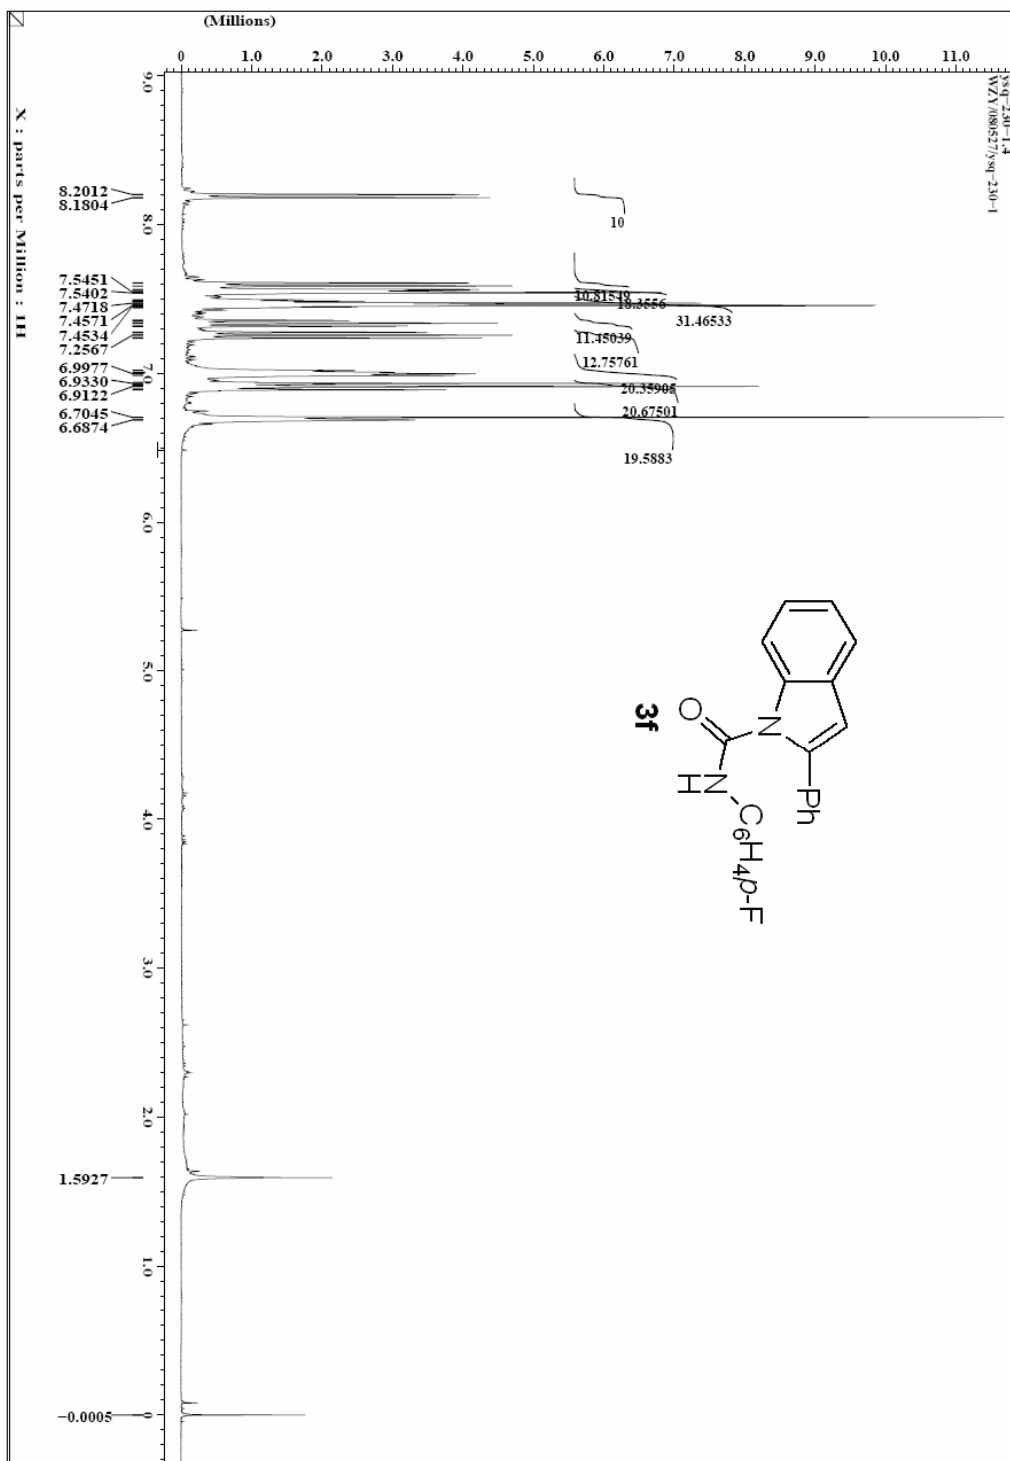



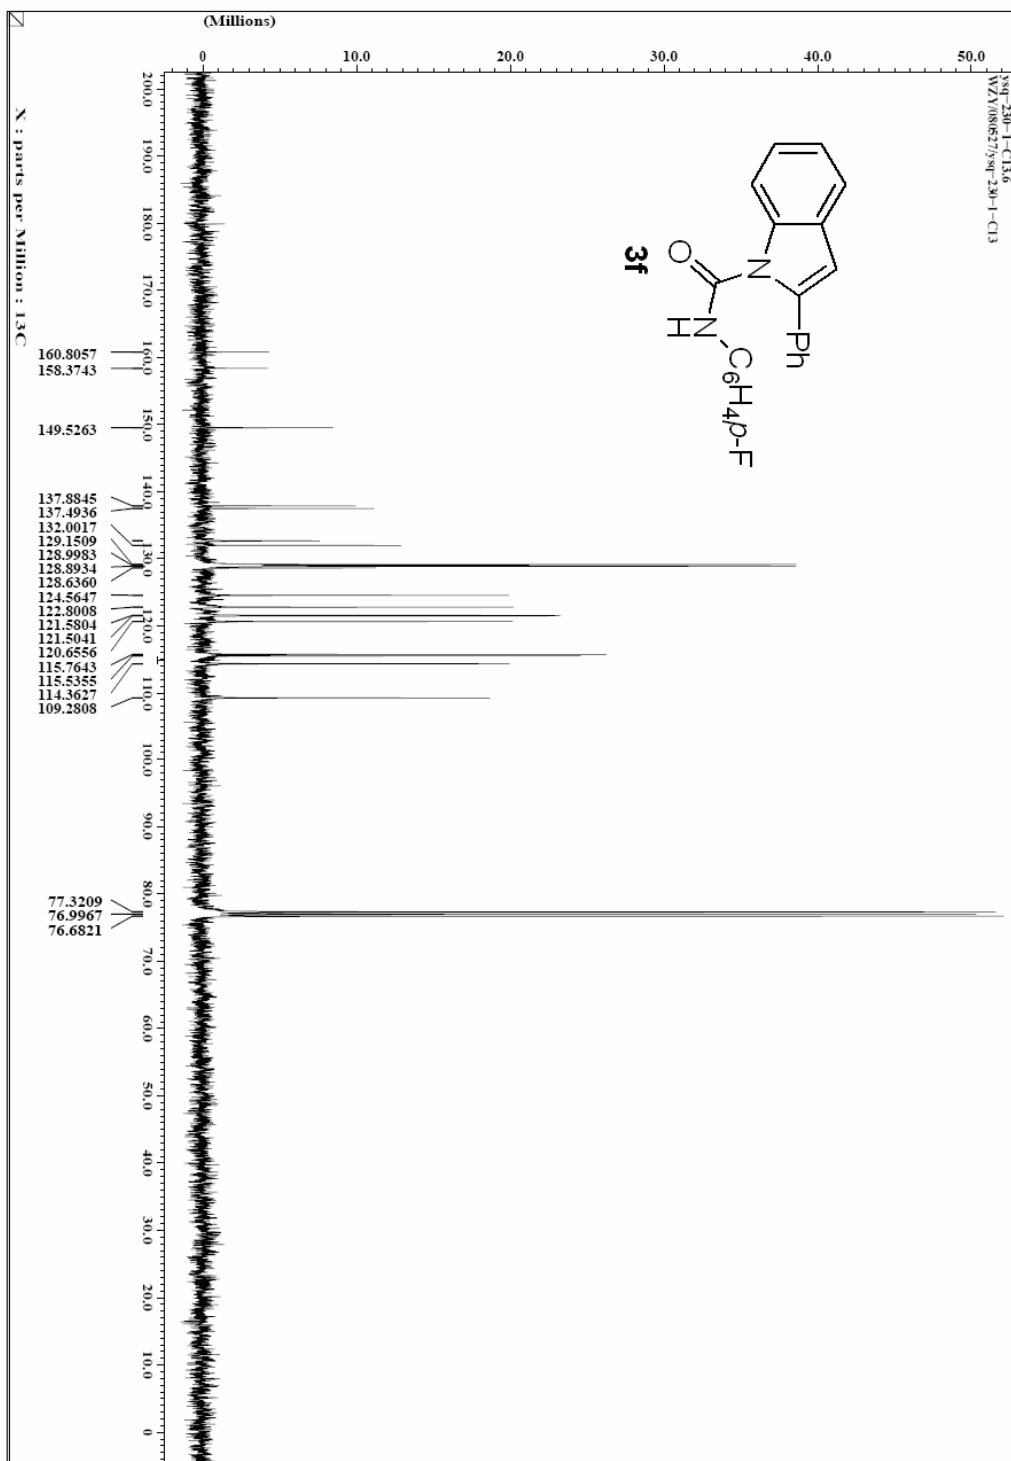

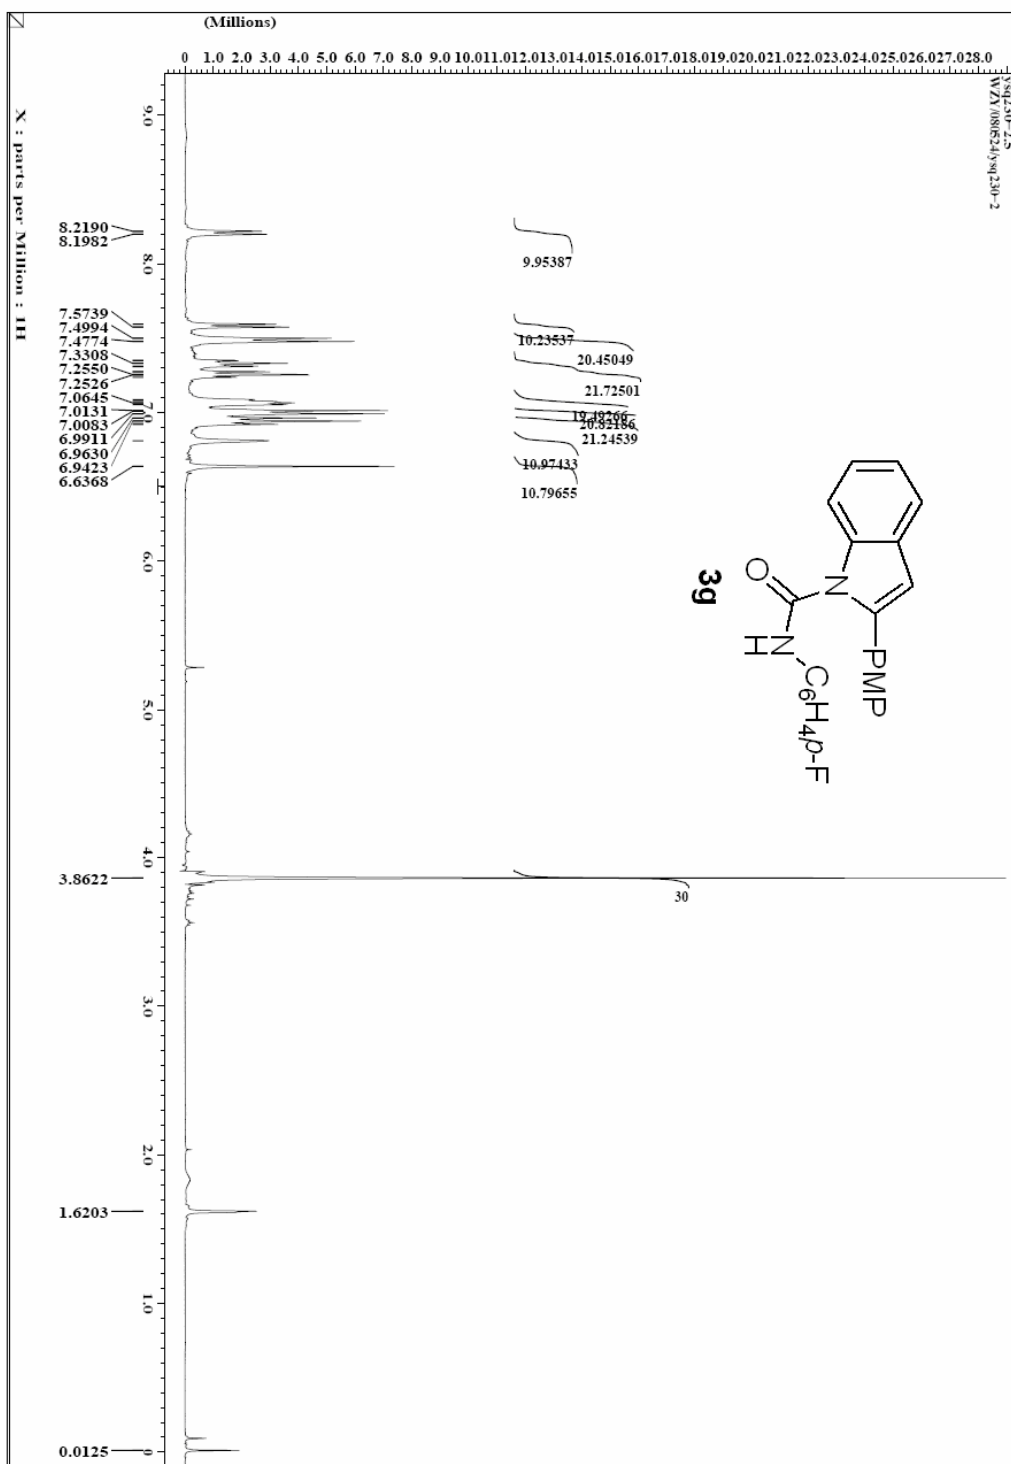

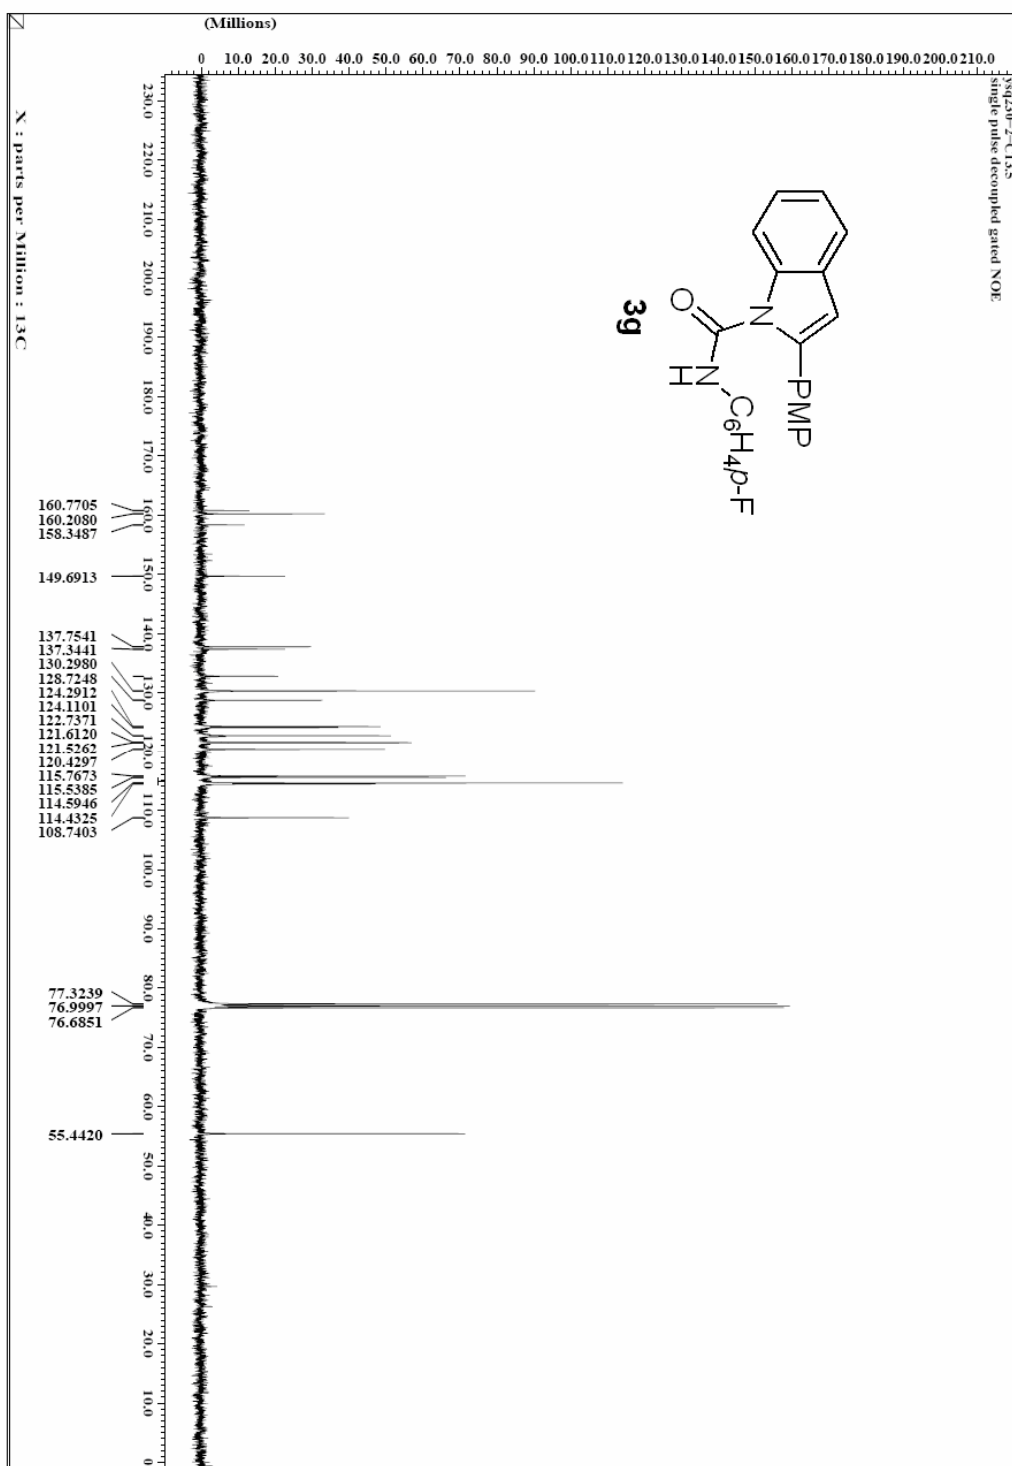

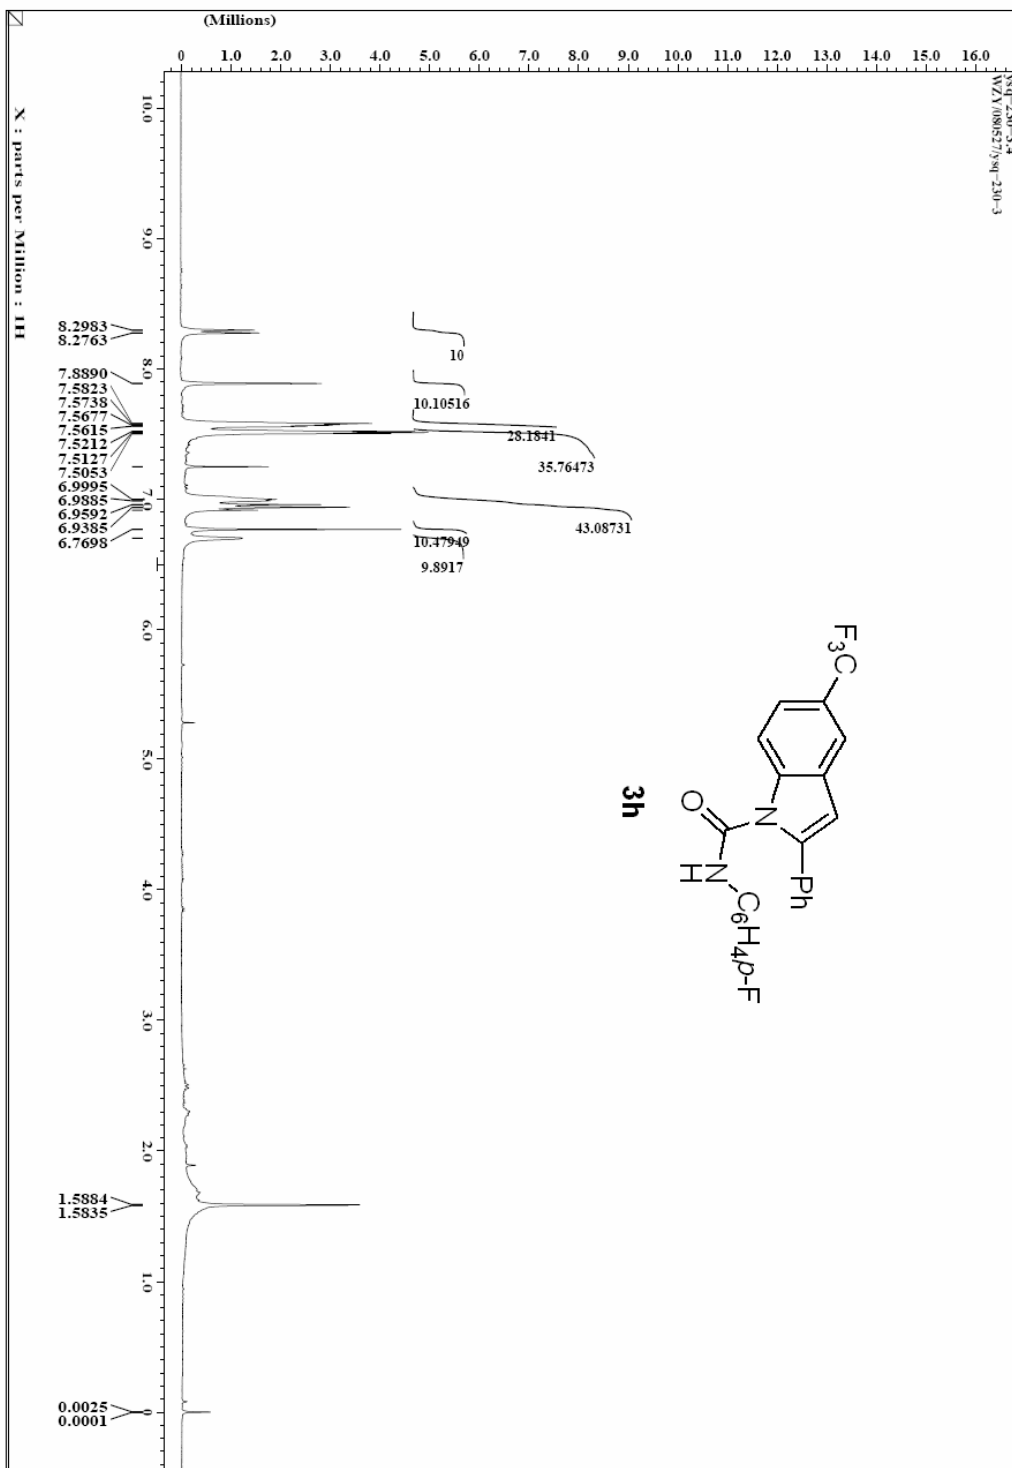

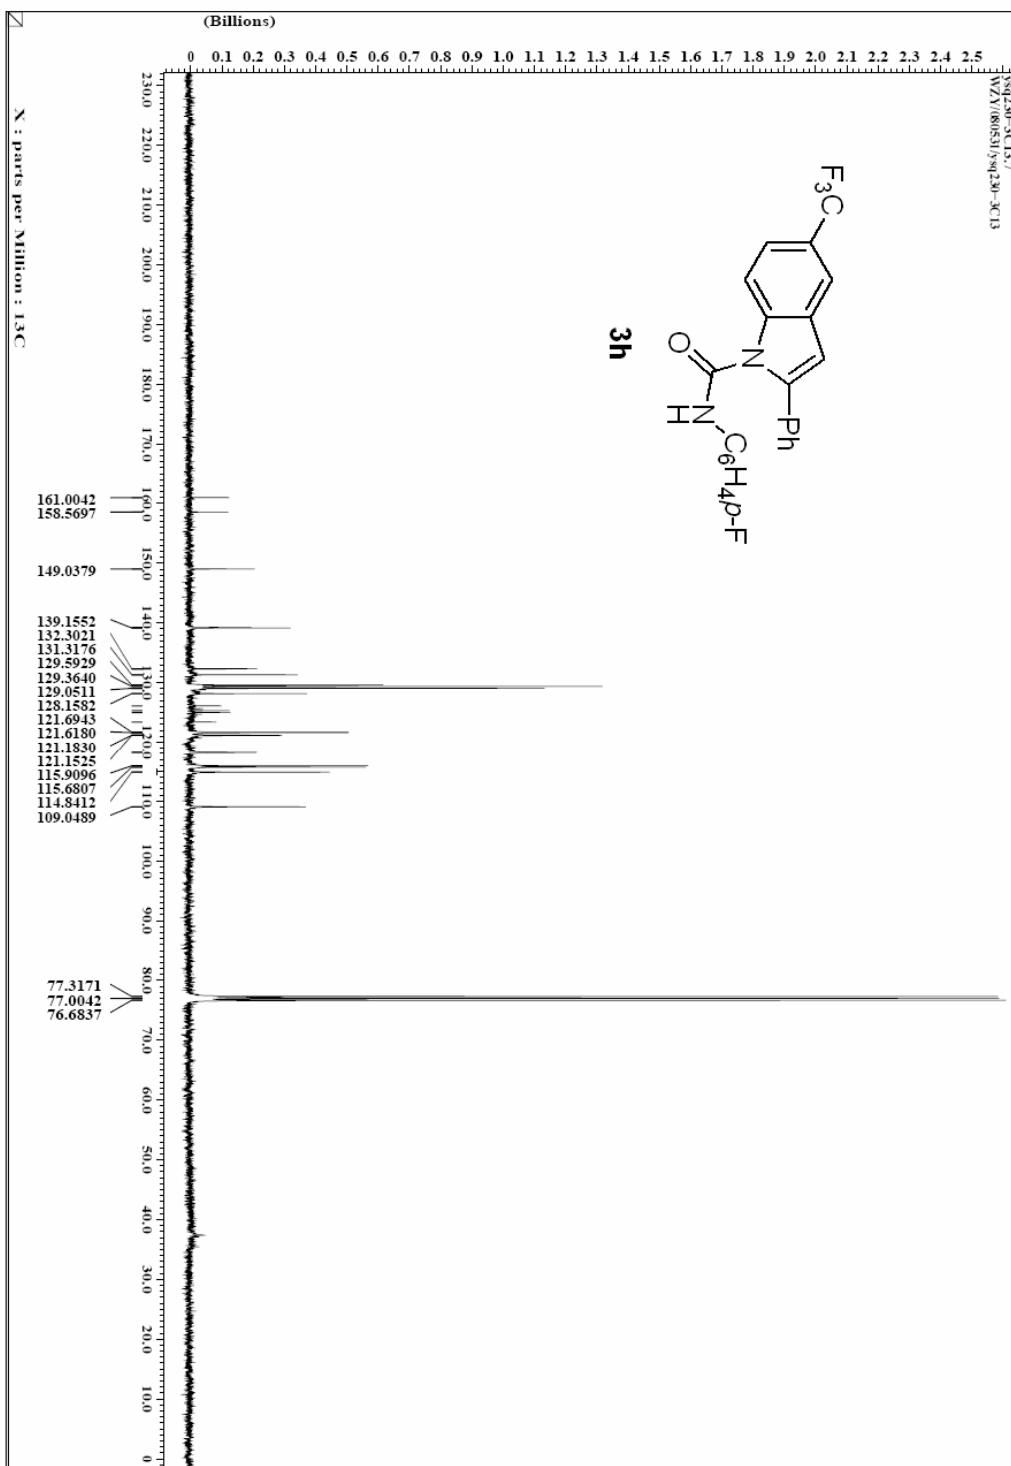

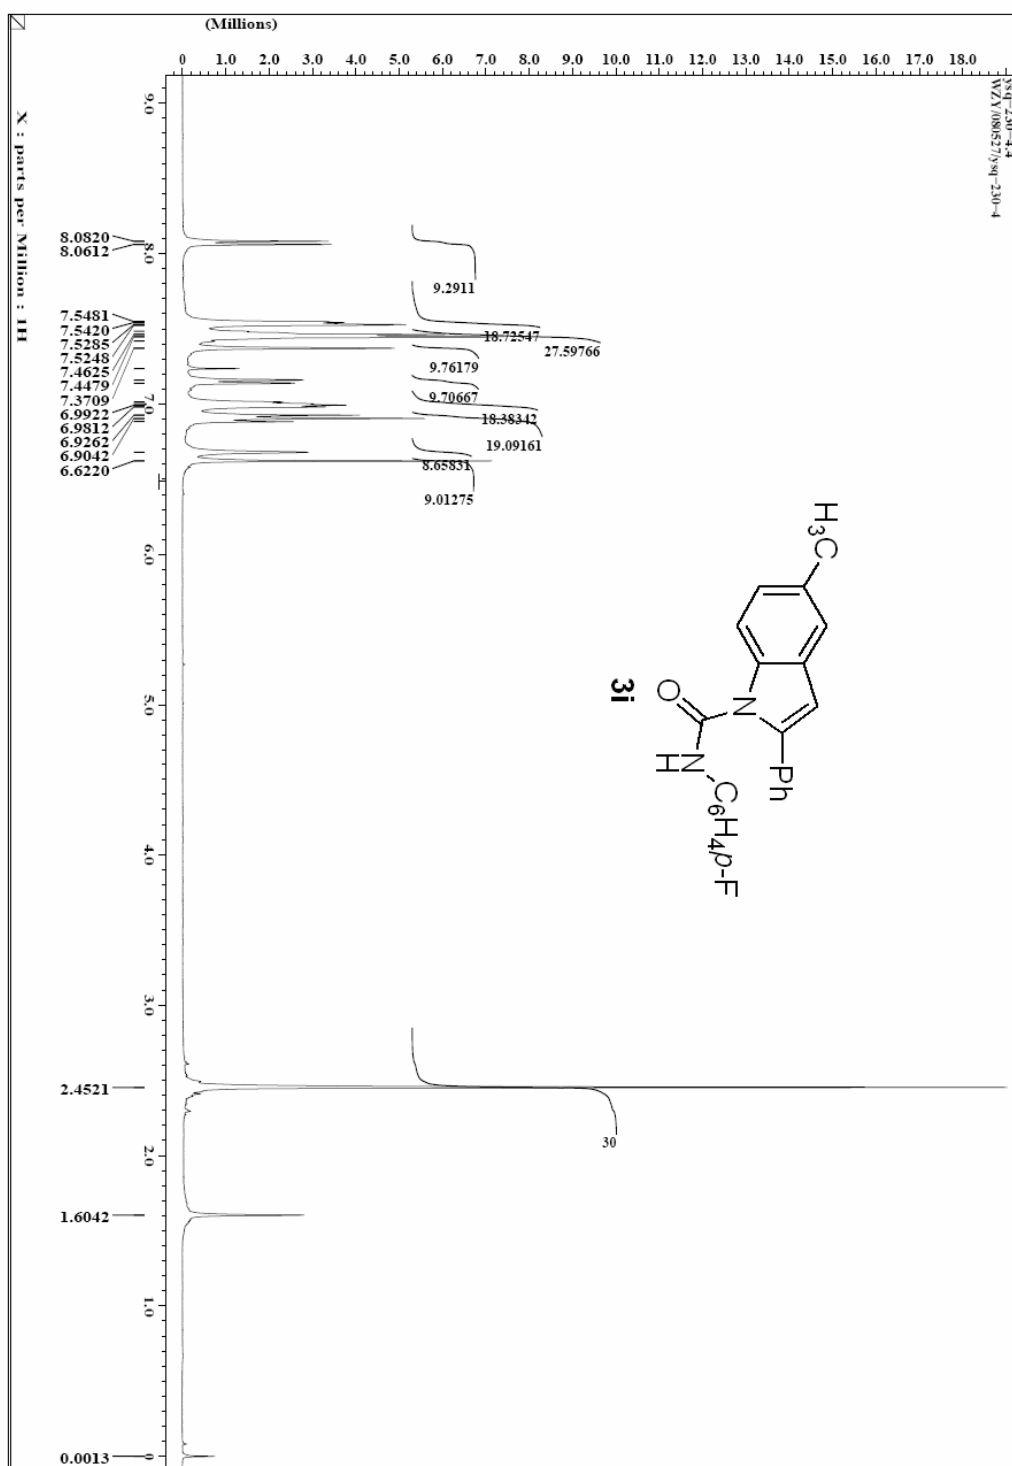

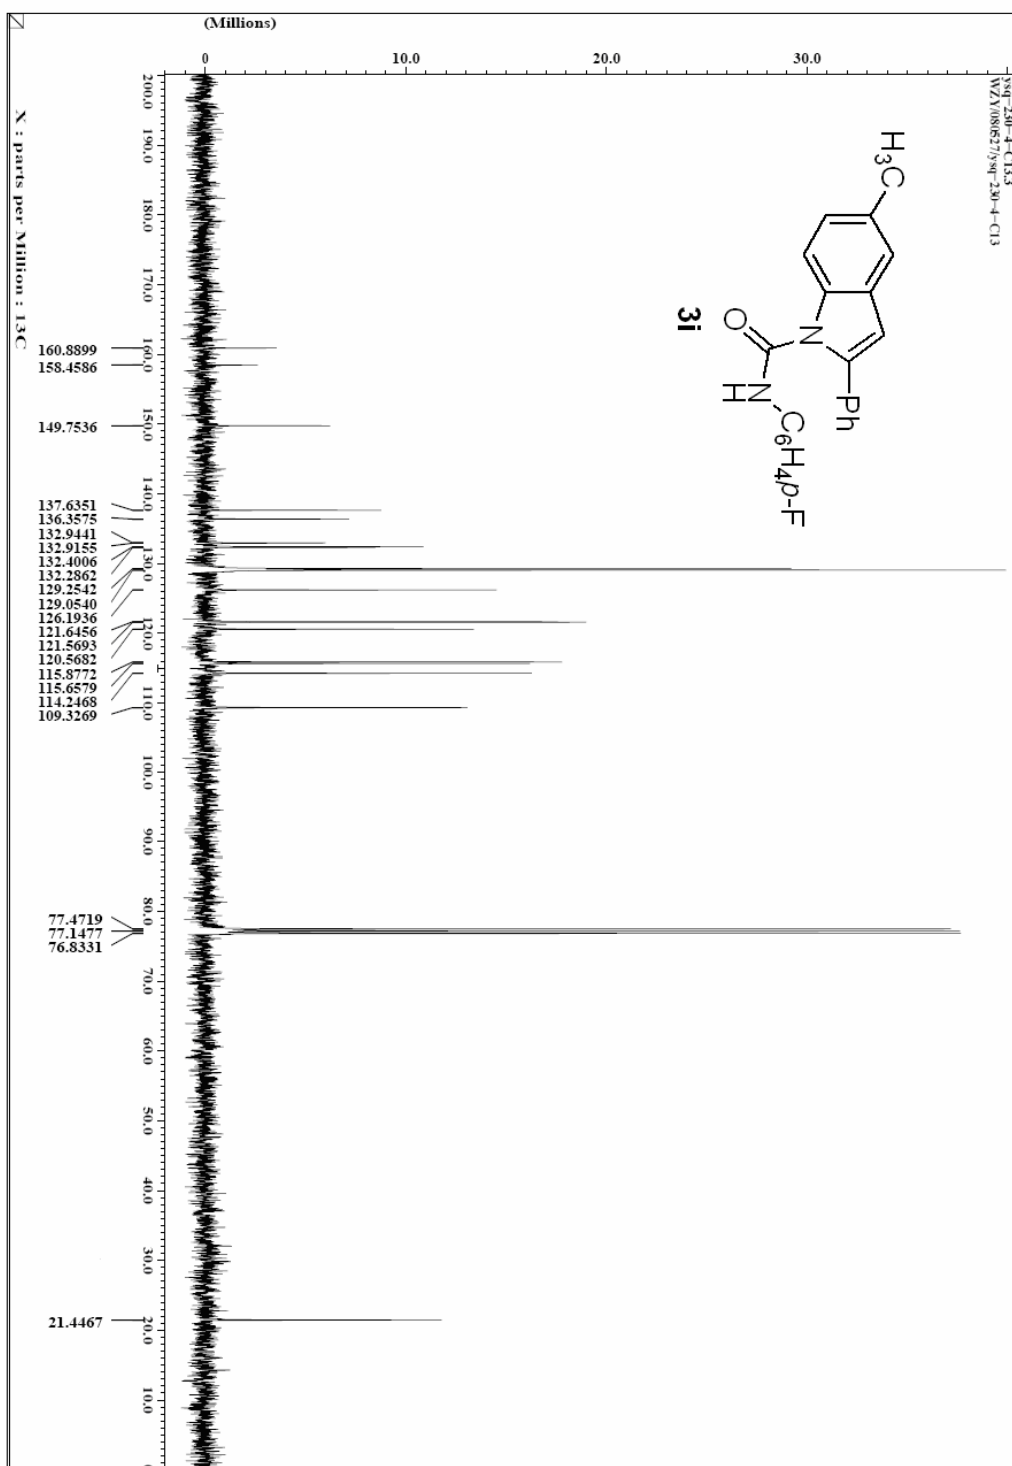

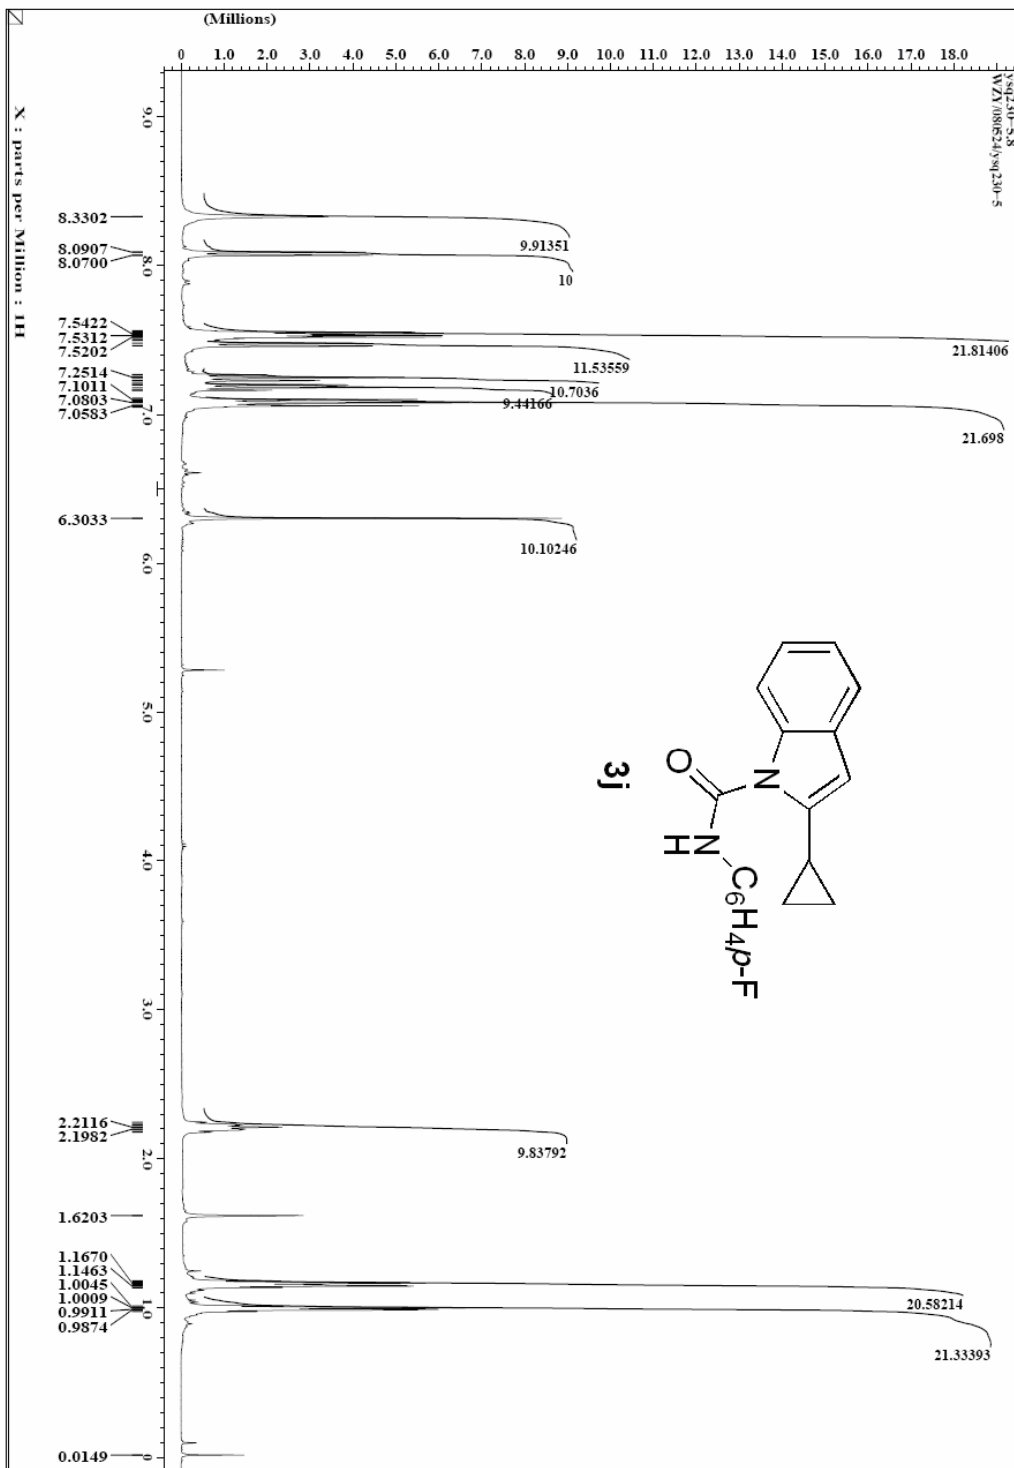



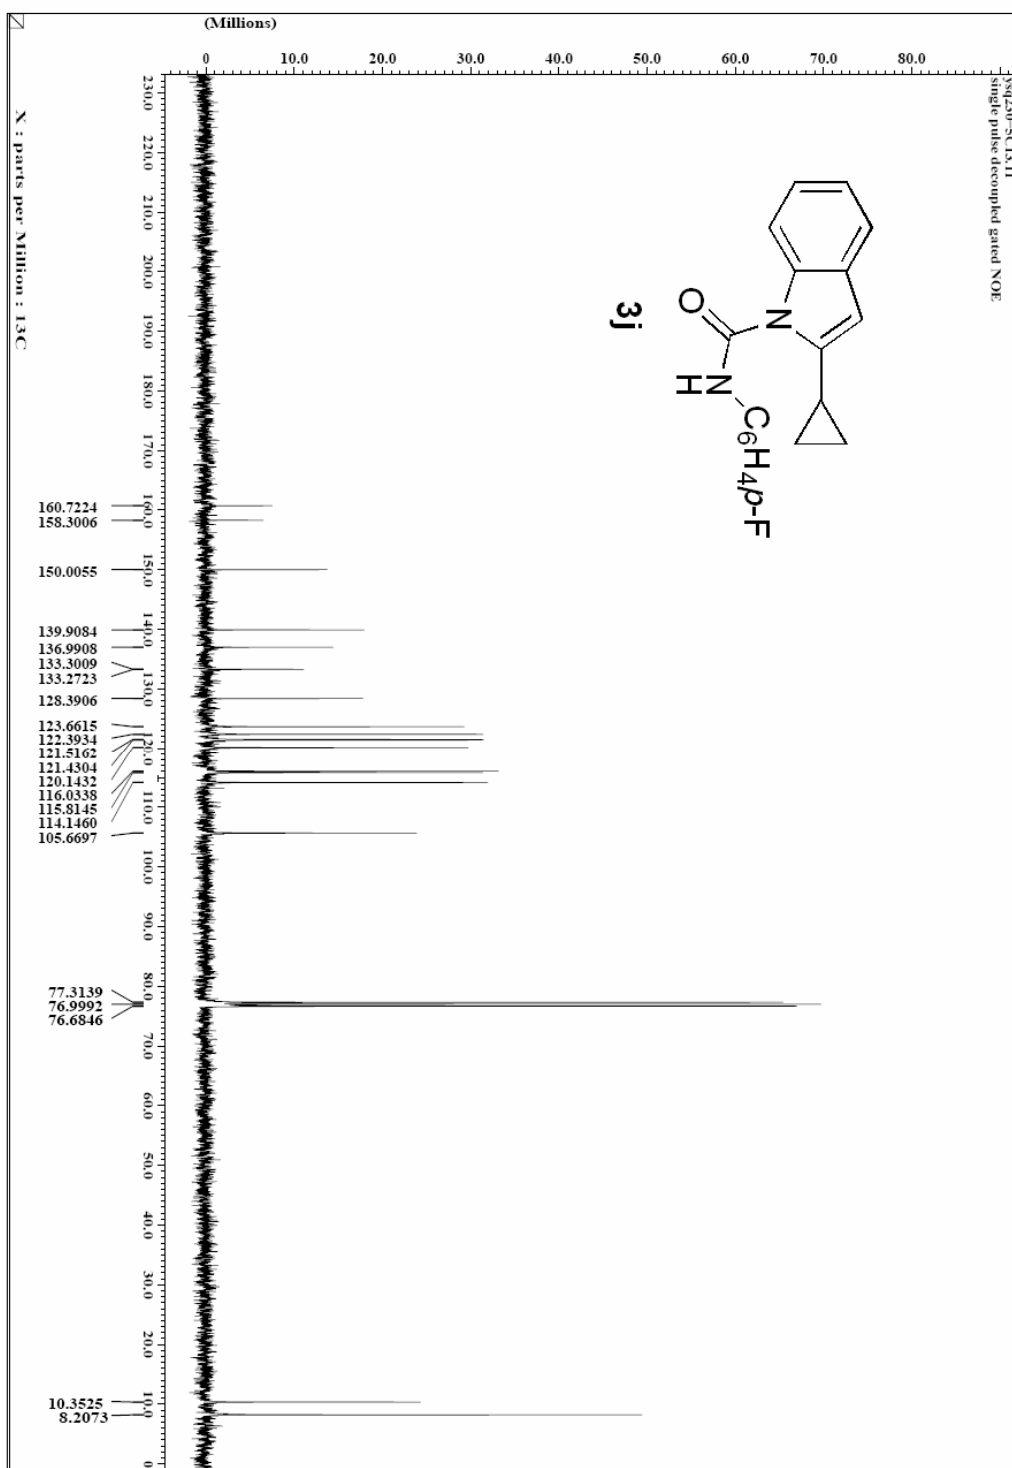

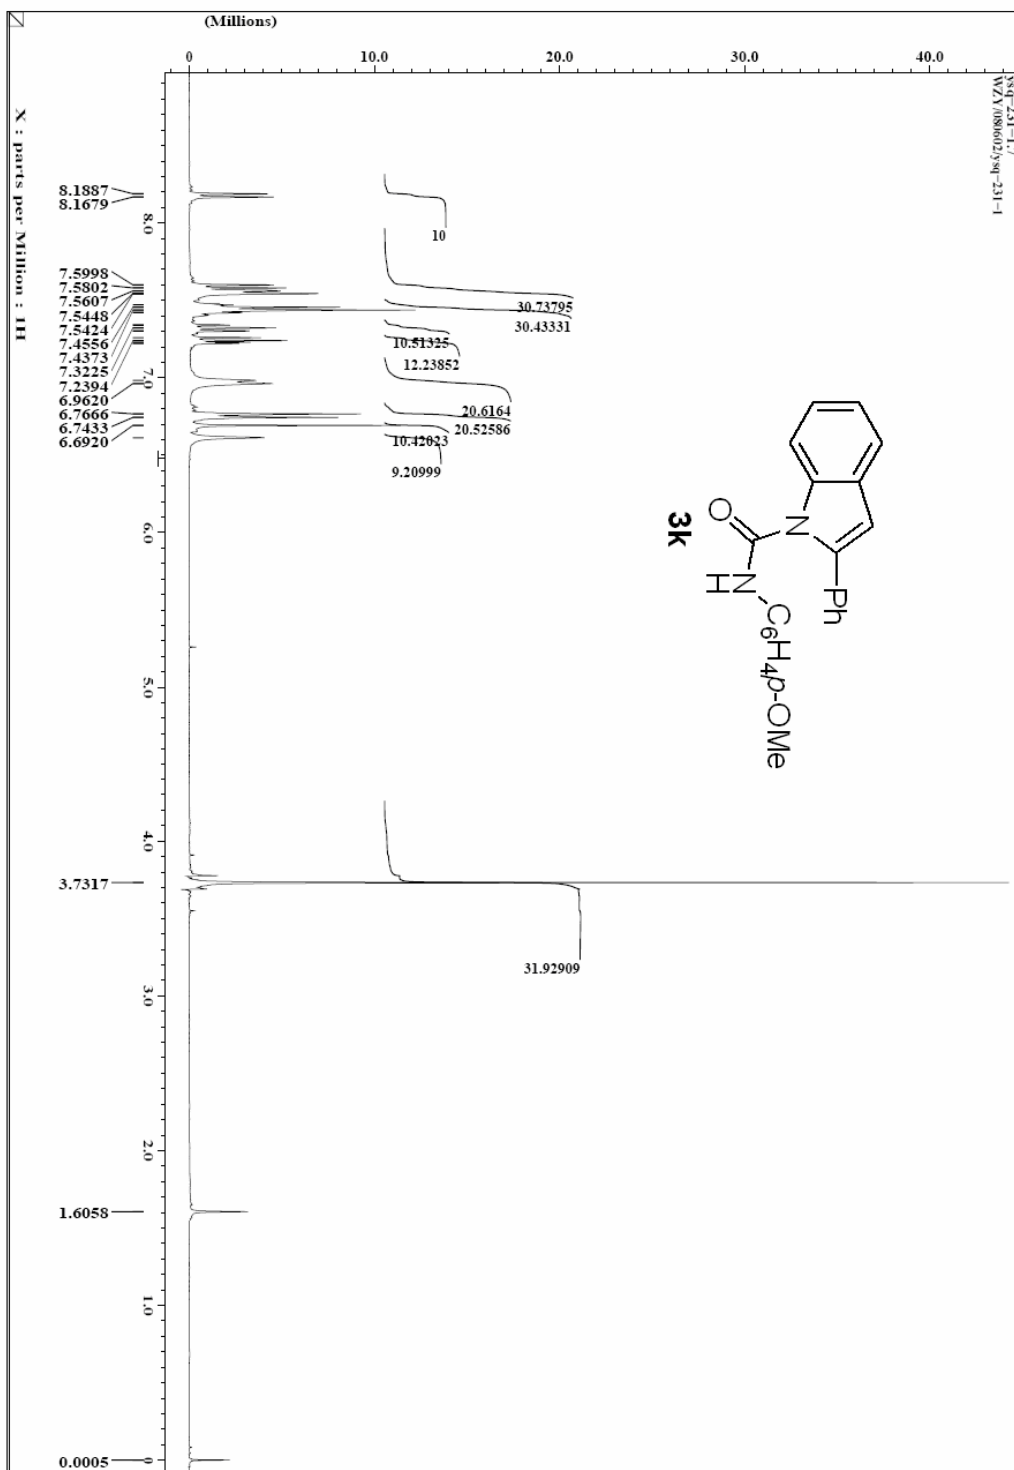

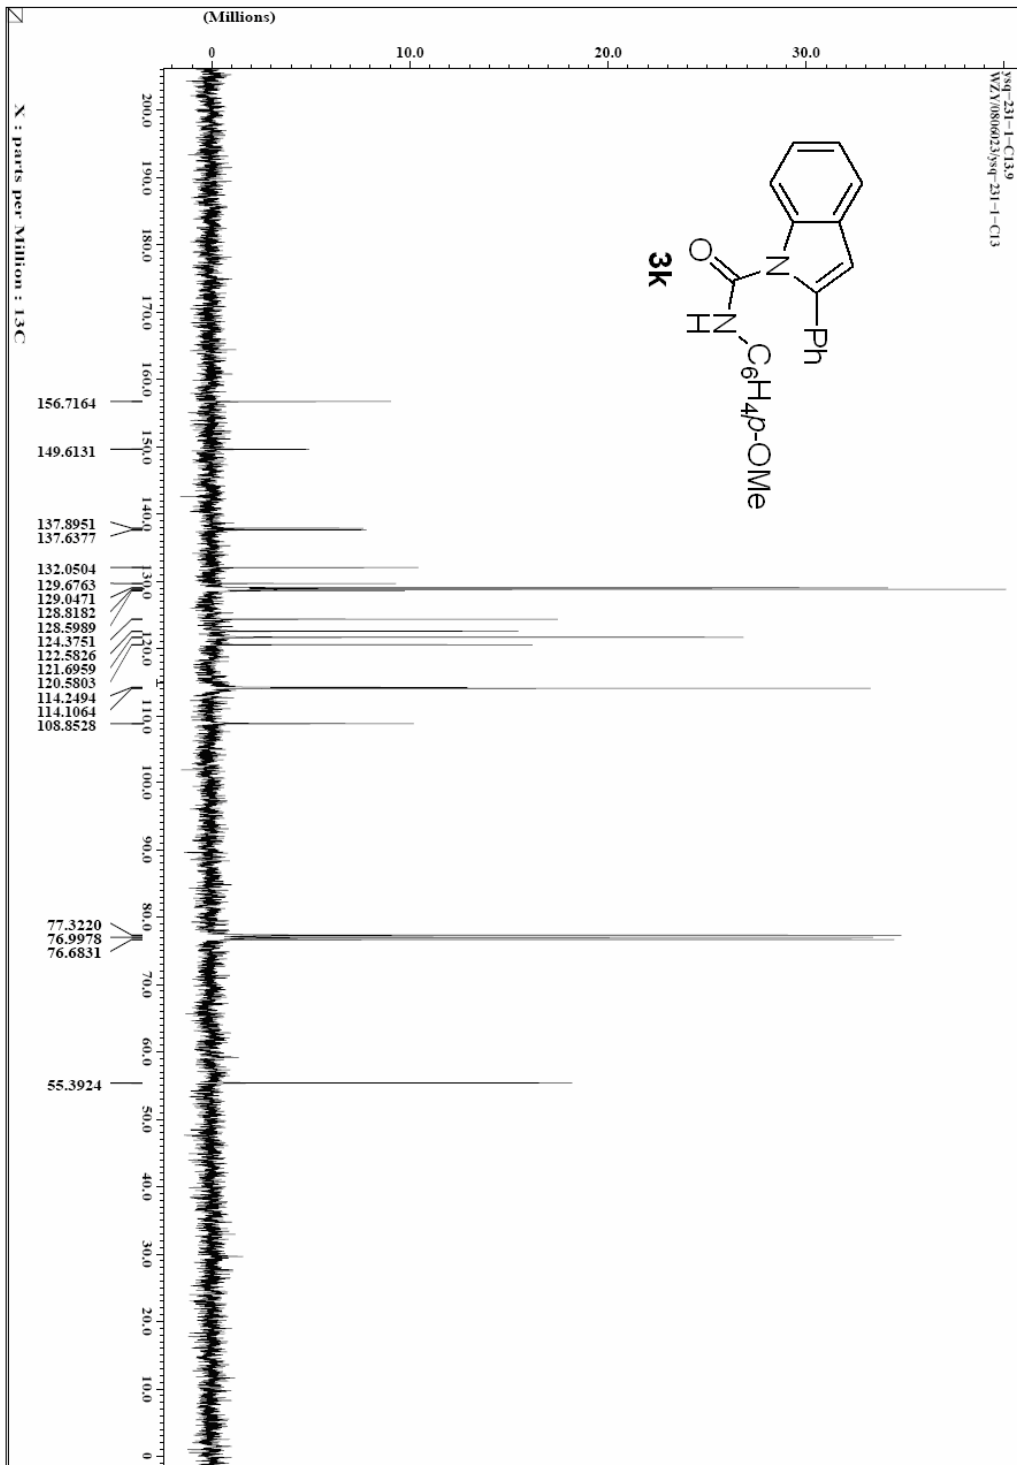

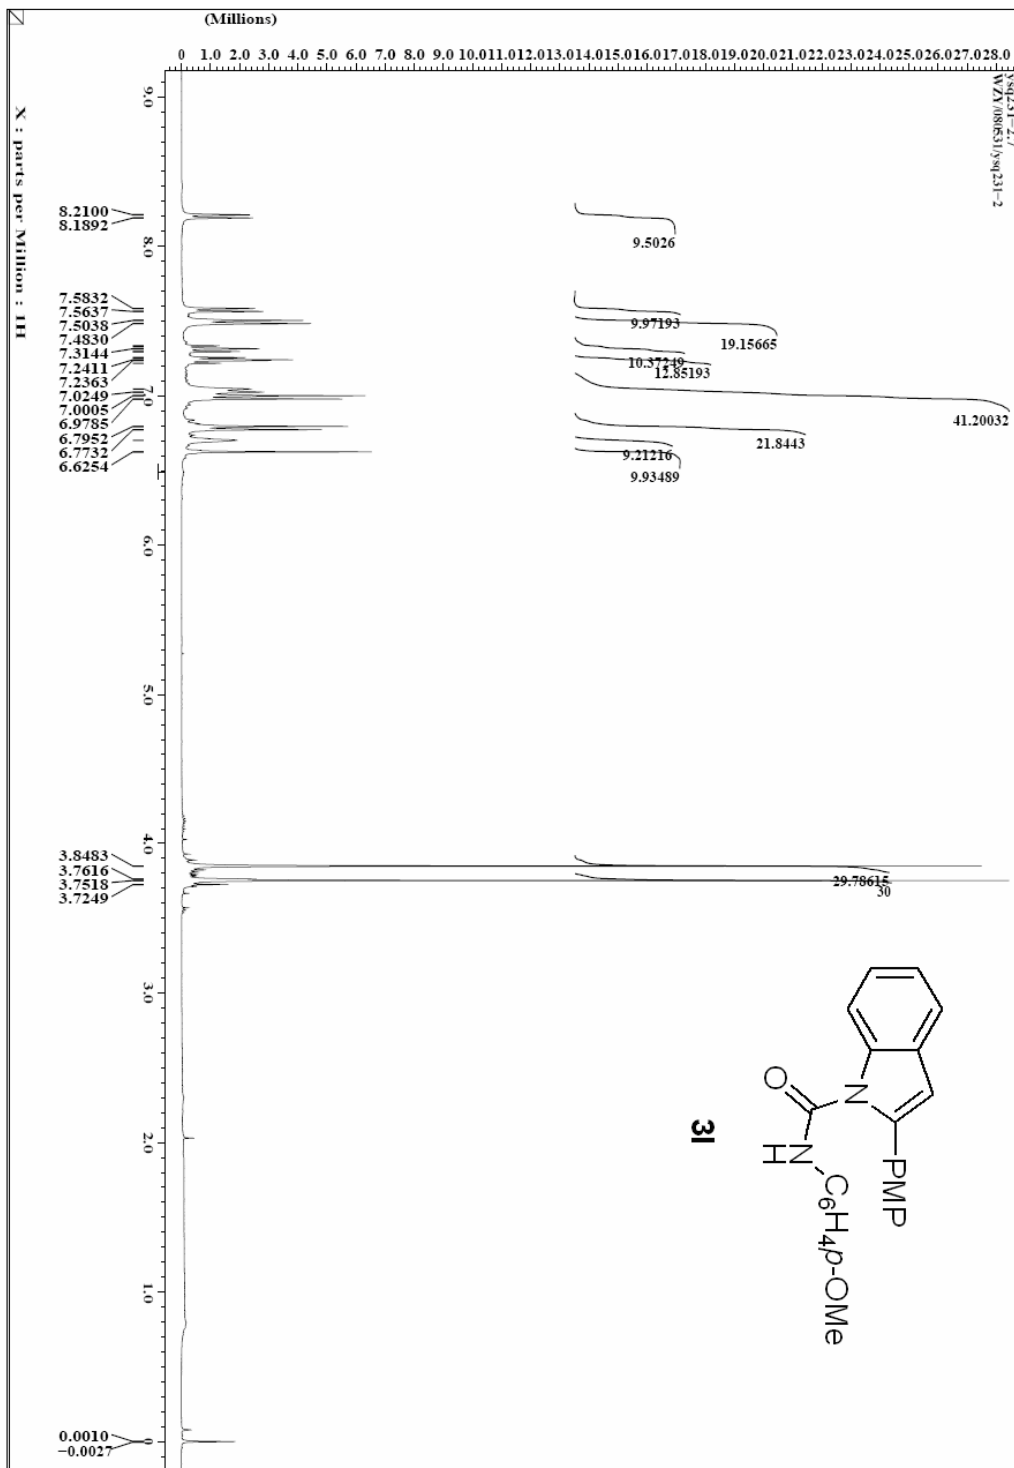

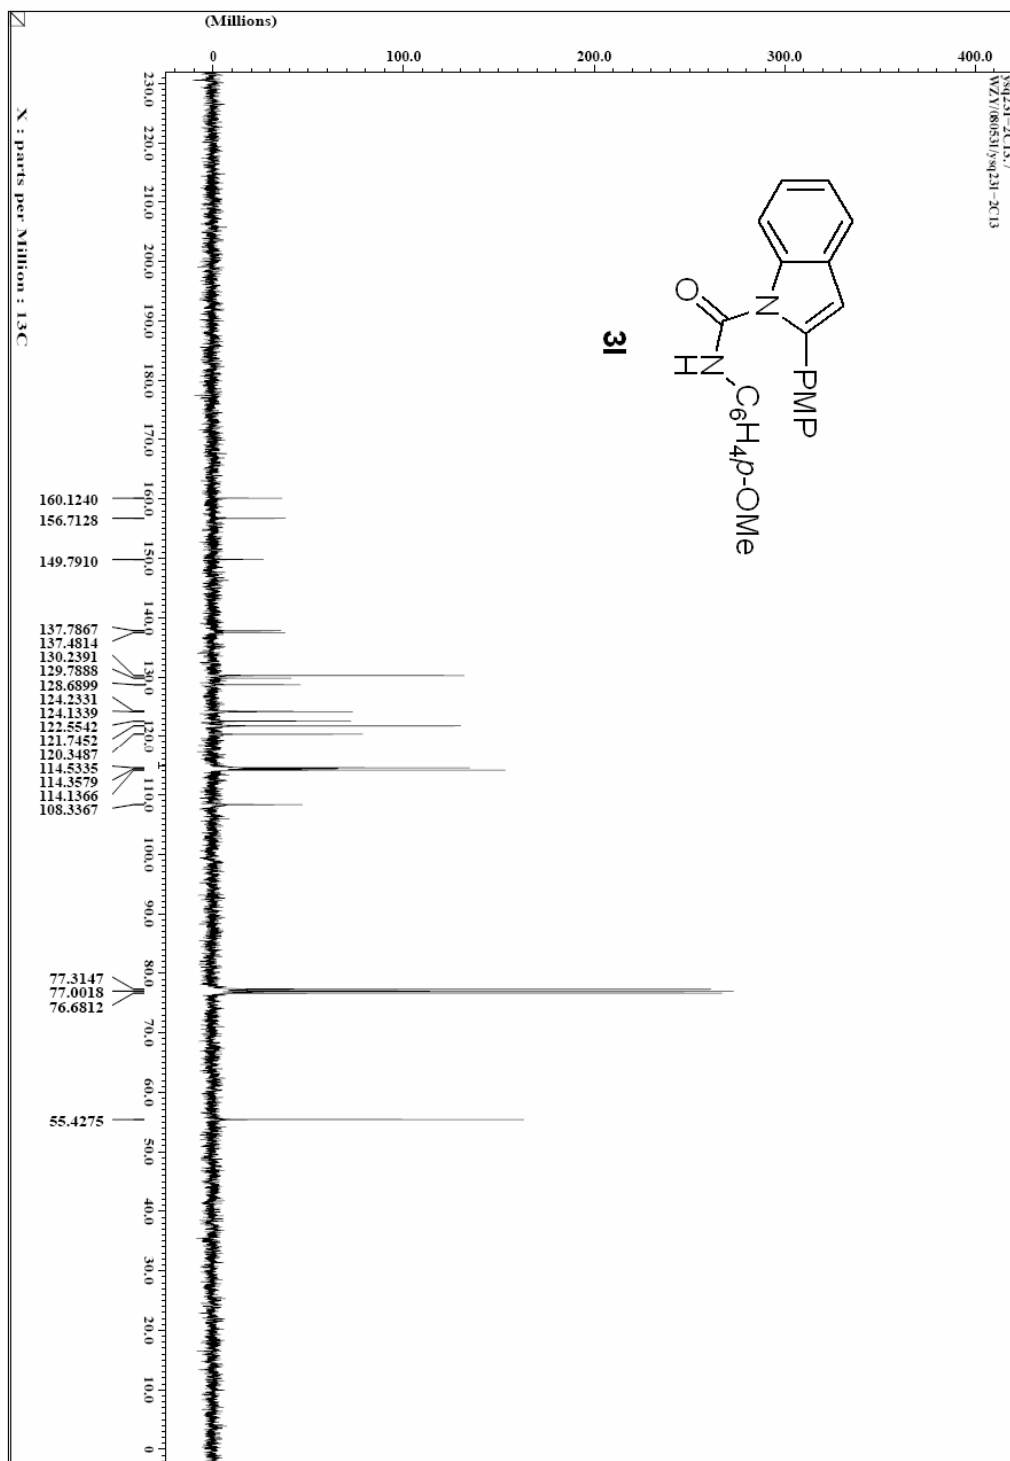

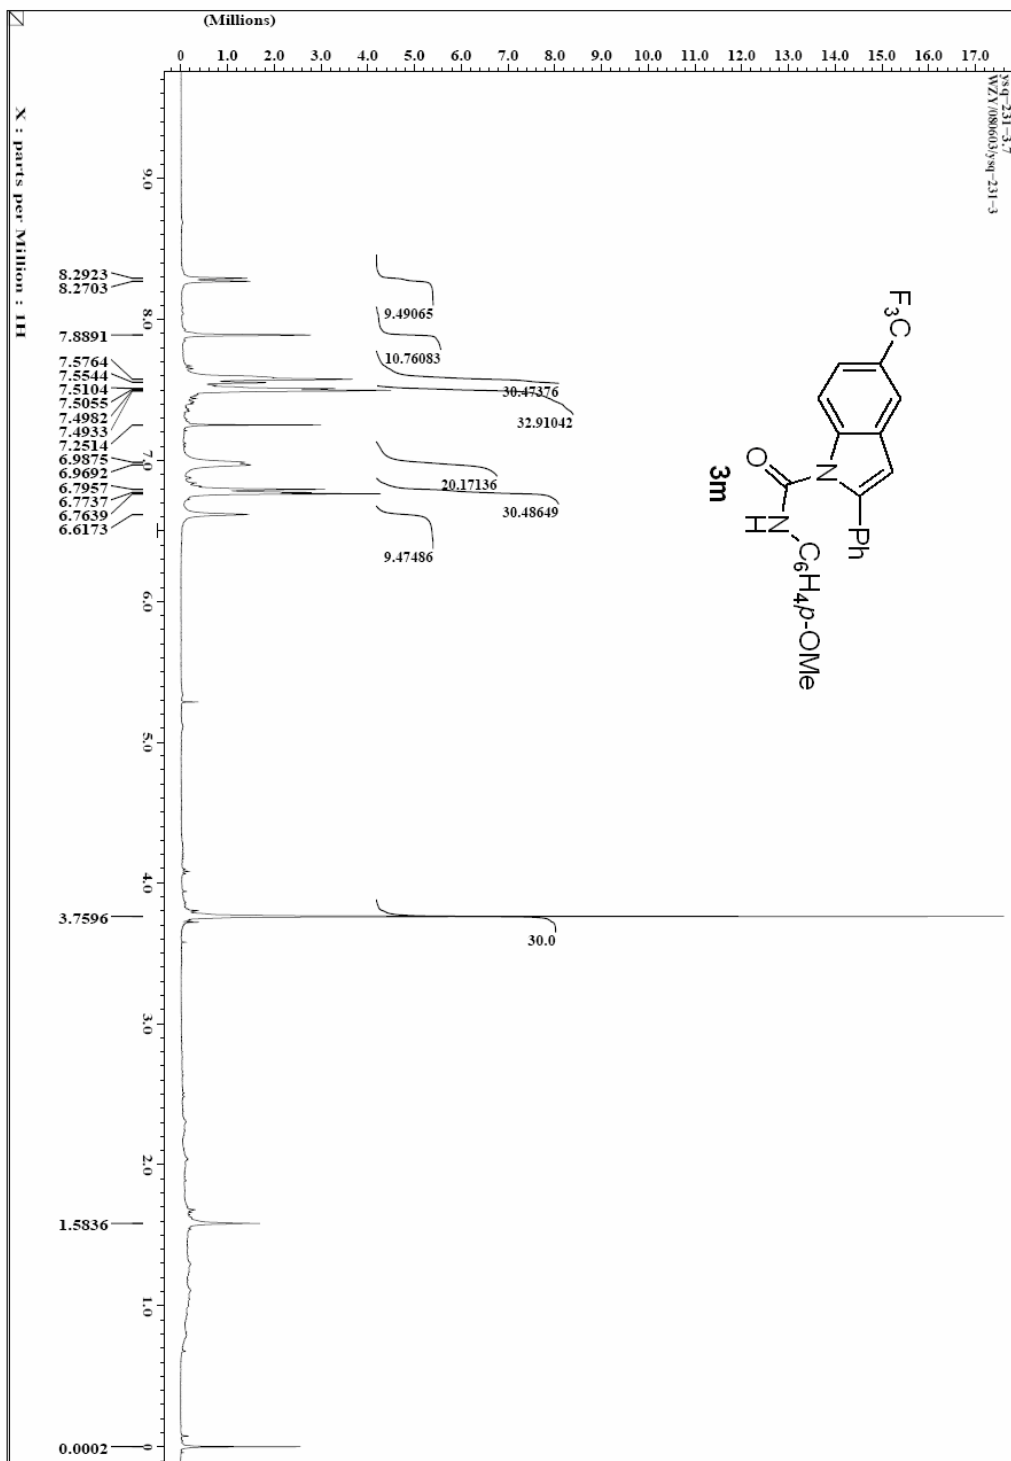

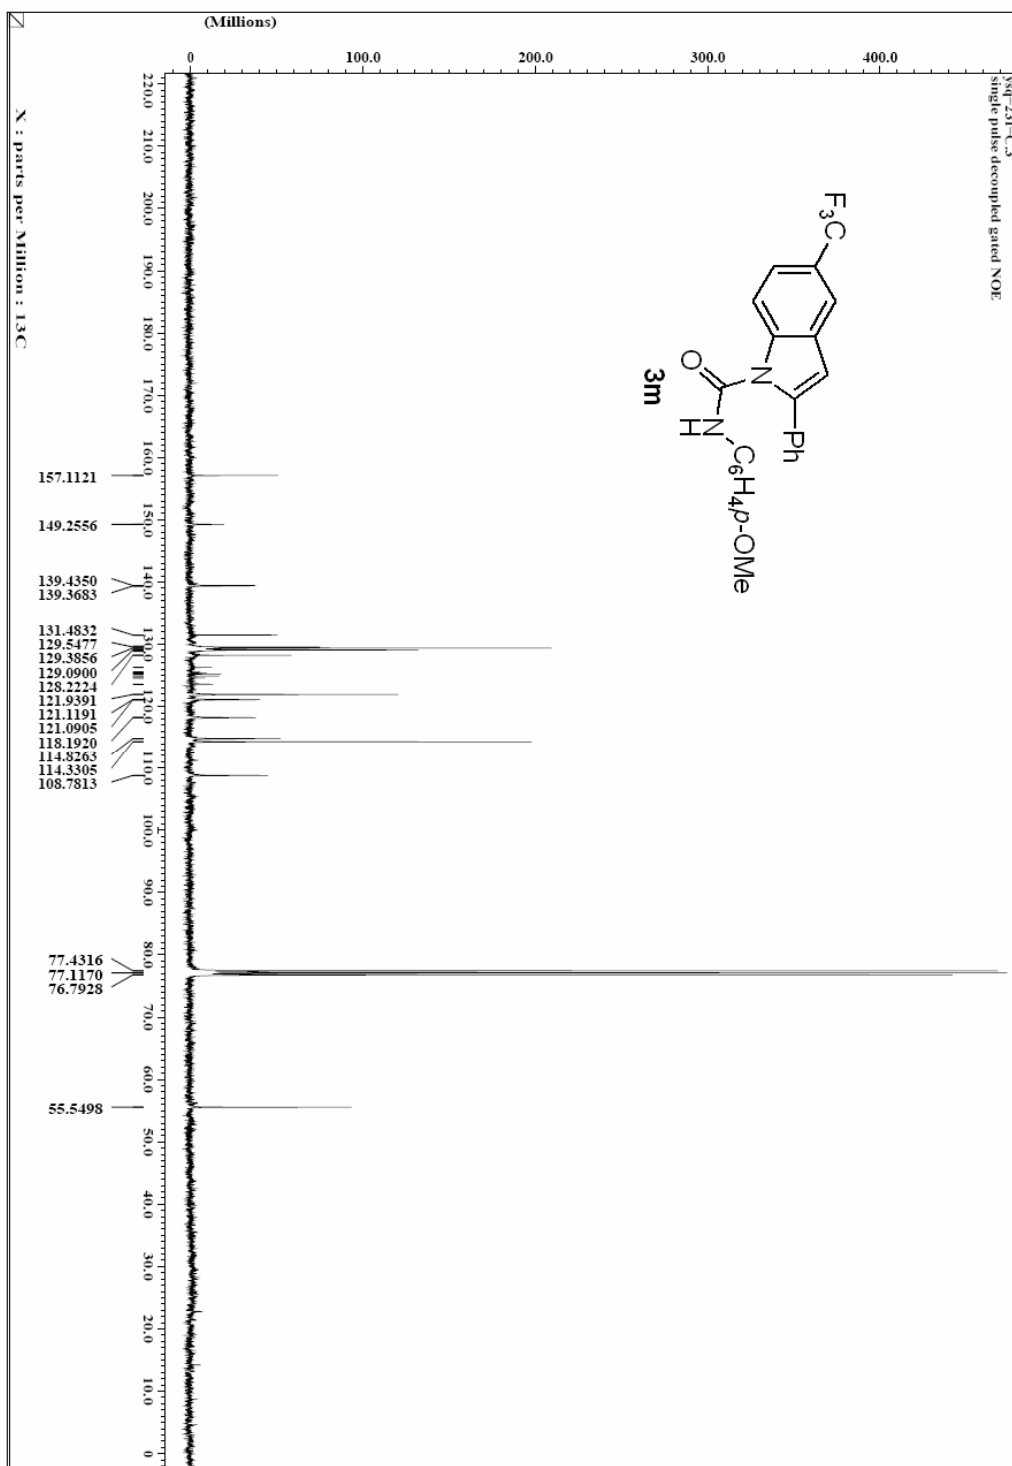

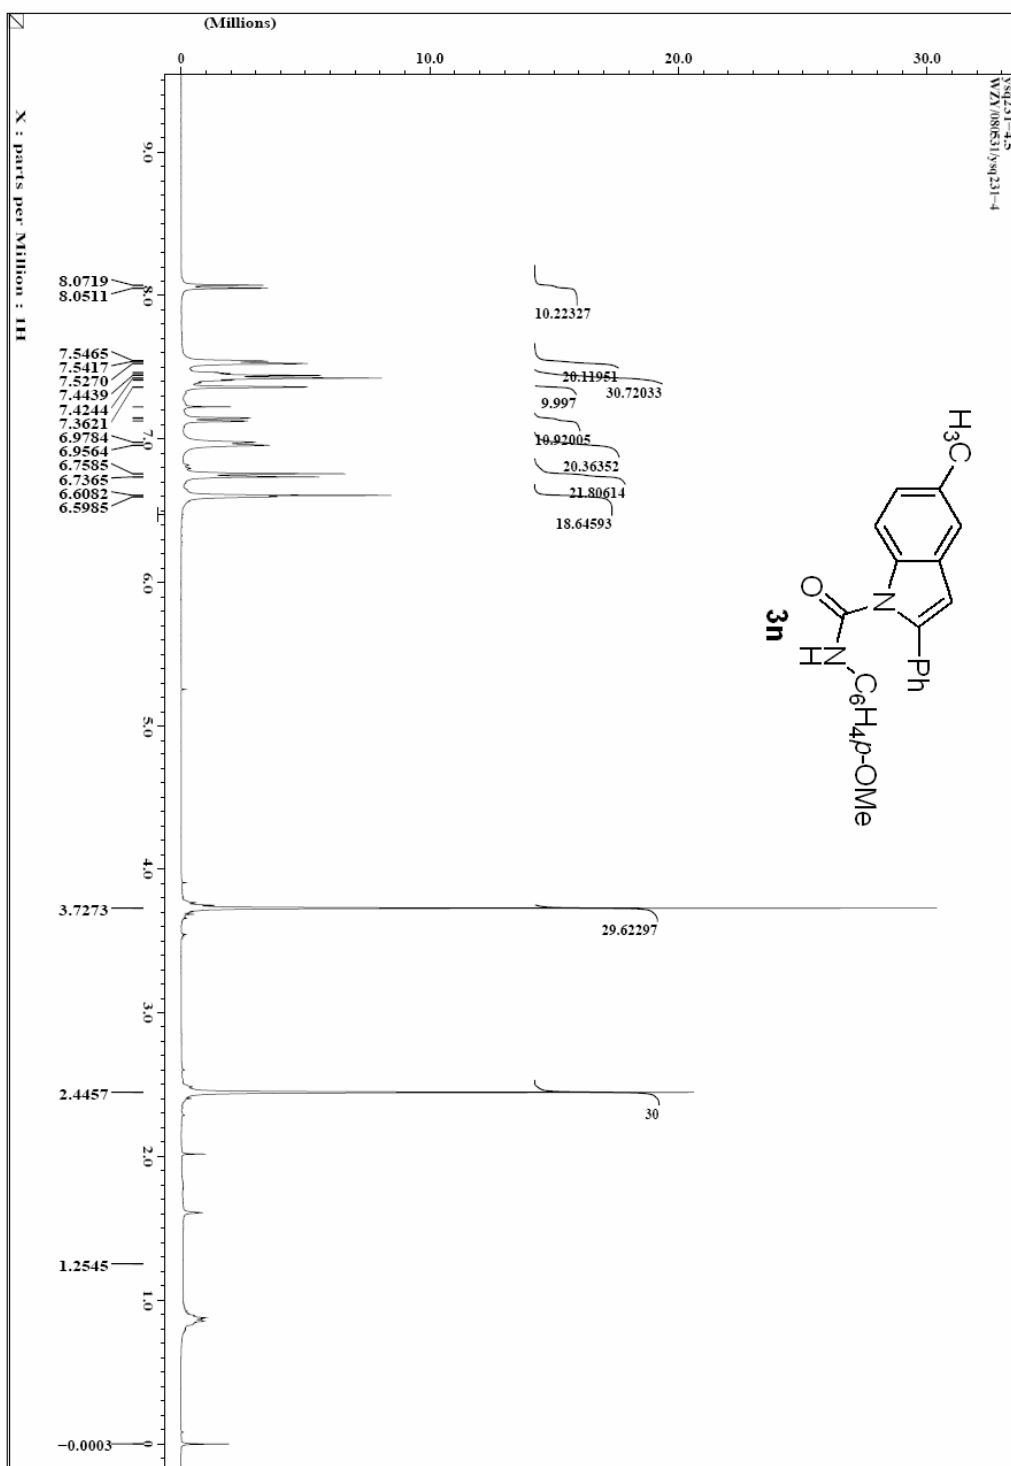



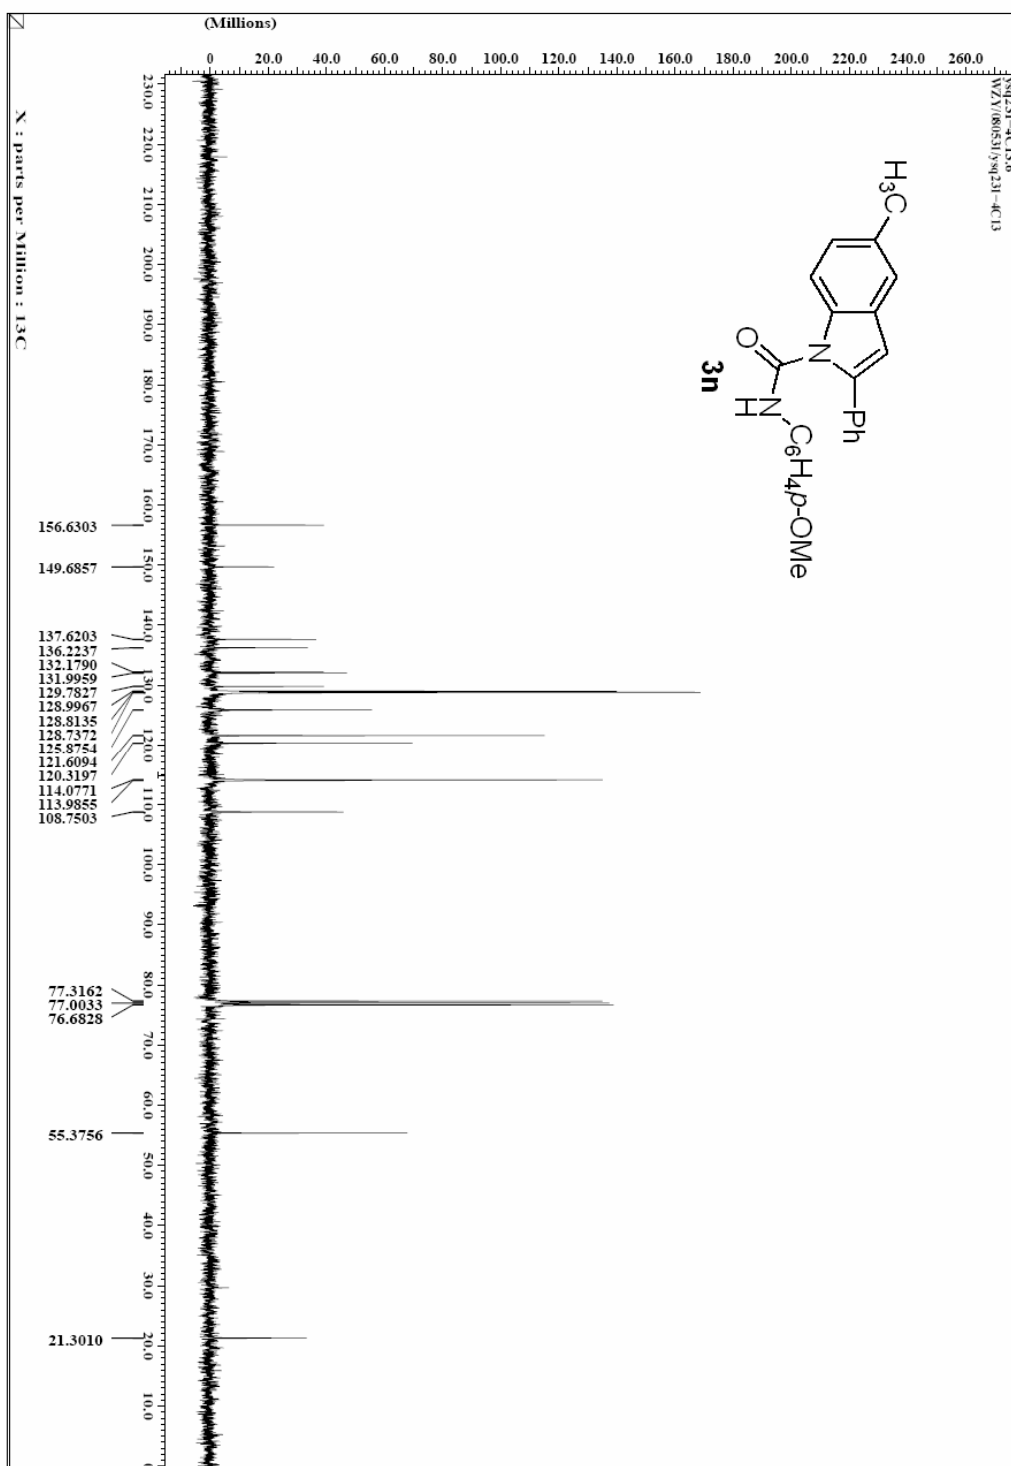

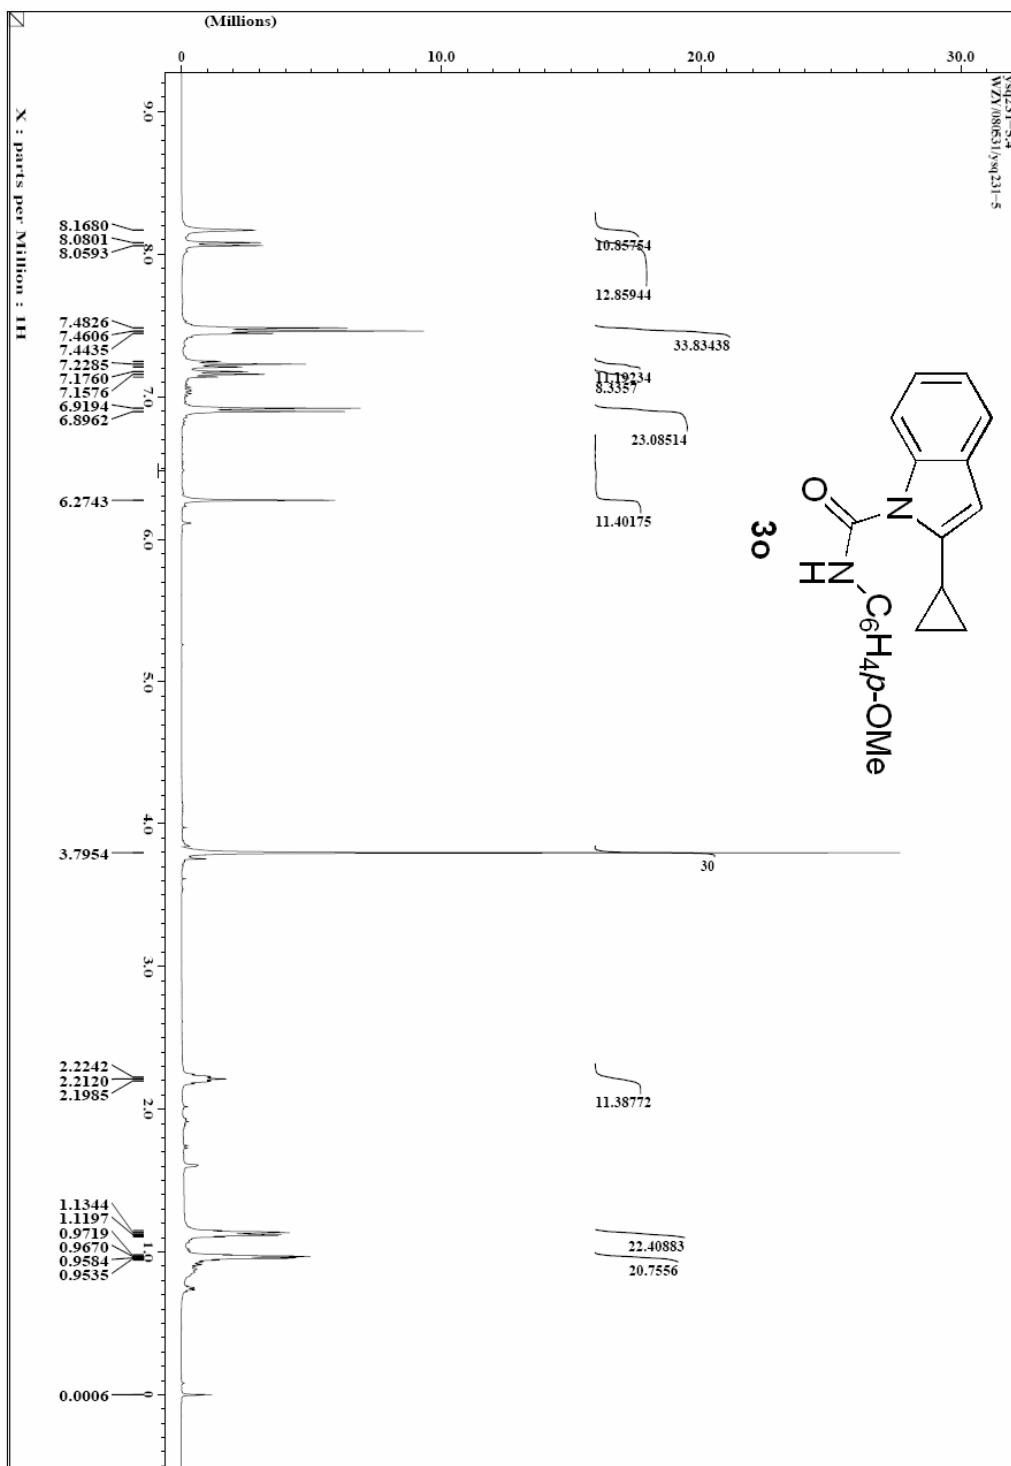

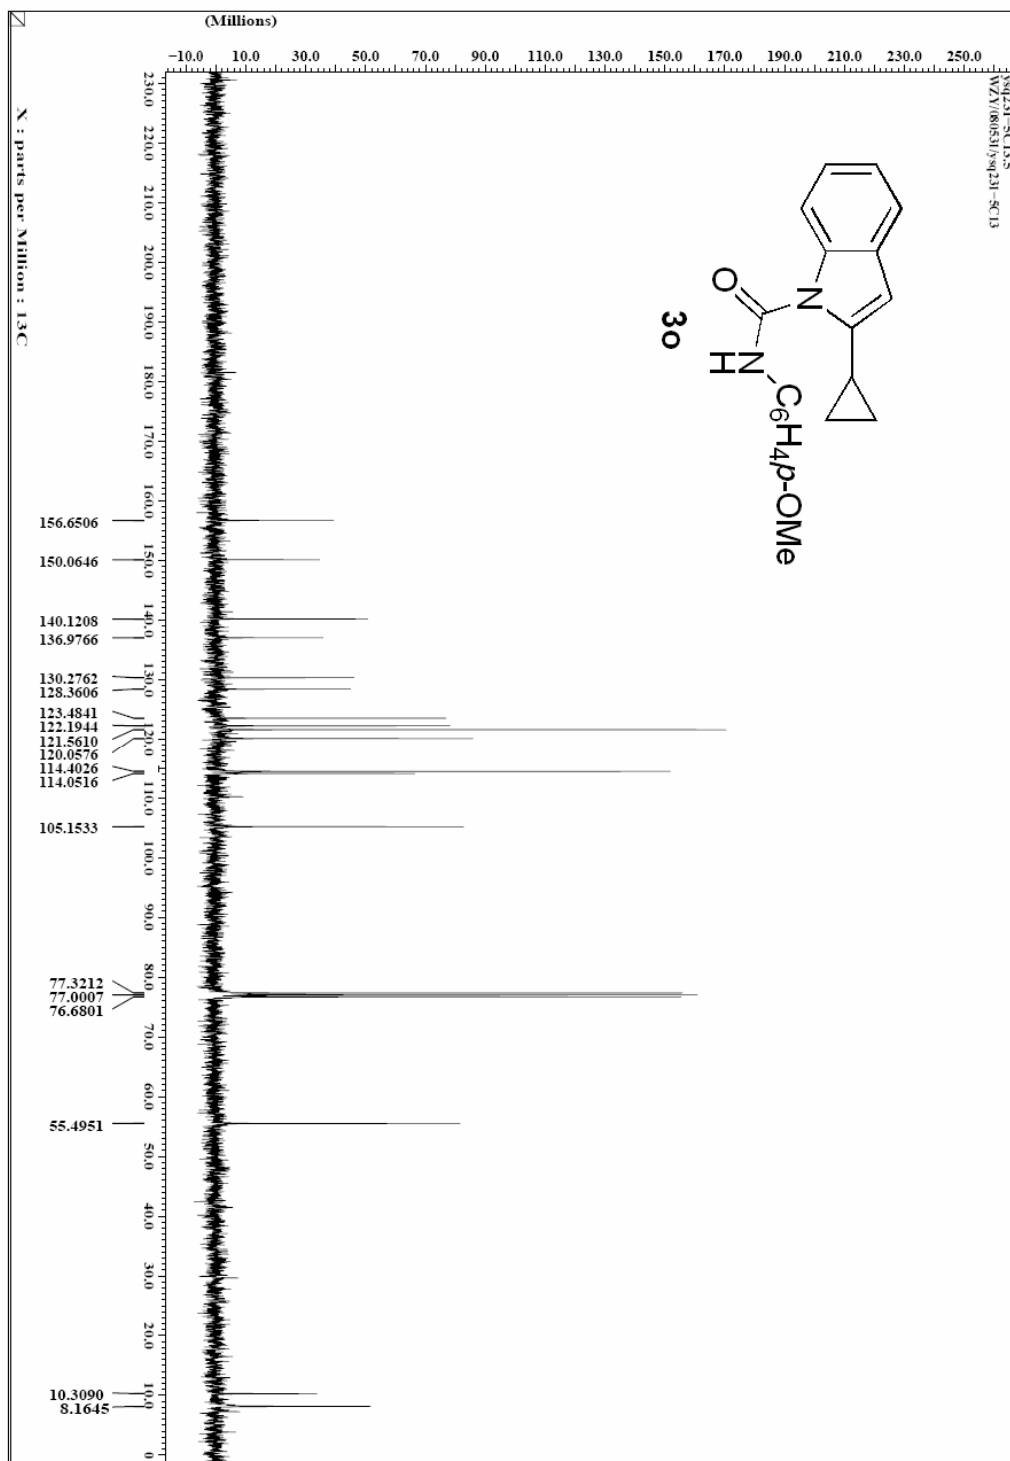

Supplement: b812015c.pdf [file b812015c.pdf]
